1     **Light-harvesting in mesophotic corals is powered by a spatially**  
2             **efficient photosymbiotic system between coral host and**  
3                     **microalgae**

4     Netanel Kramer<sup>1\*</sup>, Raz Tamir<sup>1,2</sup>, Or Ben-Zvi<sup>1,2</sup>, Steven L. Jacques<sup>3</sup>, Yossi Loya<sup>1</sup>, Daniel  
5     Wangpraseurt<sup>4,5</sup>

6     <sup>1</sup> *School of Zoology, Tel-Aviv University, Tel Aviv 69978, Israel*

7     <sup>2</sup> *The Interuniversity Institute for Marine Sciences of Eilat, Eilat 88103, Israel*

8     <sup>3</sup> *University of Washington, Seattle, USA*

9     <sup>4</sup> *Department of Nanoengineering, University of California San Diego, San Diego, USA*

10    <sup>5</sup> *Department of Chemistry, University of Cambridge, Cambridge, UK*

11

12    Corresponding author: Netanel Kramer <[nati.kramer@gmail.com](mailto:nati.kramer@gmail.com)>

13

14

15

16

17

## 18 **Summary**

19           The coral-algal photosymbiosis fuels global coral-reef primary productivity, extending  
20 from sea level to as deep as 150 m (i.e., mesophotic). Currently, it is largely unknown how  
21 such mesophotic reefs thrive despite extremely limited light conditions. Here, we show that  
22 corals exhibit a plastic response to mesophotic conditions that involves a spatially optimized  
23 regulation of the bio-optical properties by coral host and symbiont. In contrast to shallow  
24 corals, mesophotic corals absorbed up to three-fold more light, resulting in excellent  
25 photosynthetic response under light conditions of only ~3% of the incident surface irradiance.  
26 The enhanced light harvesting capacity of mesophotic corals is regulated by average refractive  
27 index fluctuations in the coral skeleton that give rise to optical scattering and facilitate light  
28 transport and absorption by densely pigmented host tissue. The results of this study provide  
29 fundamental insight into the energy efficiency and light-harvesting mechanisms underlying the  
30 productivity of mesophotic coral reef ecosystems, yet also raise concerns regarding their ability  
31 to withstand prolonged environmental disturbances.

32

33 **Keywords:** *Light-harvesting; Bio-optics; Photobiology; Ecophysiology; Mesophotic Coral*  
34 *Ecosystems (MCEs); Red Sea*

35

36

37

38

39

40

41

## 42 **Introduction**

43           Scleractinian corals are the primary building blocks of coral reef ecosystems. Coral  
44 calcification involves the secretion of aragonite skeleton that provides the basis of the three-  
45 dimensional topography and complexity of coral reefs [1]. The underlying success of corals as  
46 ecosystem engineers is mainly due to the complex interaction that takes place between the coral  
47 hosts and their endosymbiont microalgae (family: Symbiodiniaceae). The coral-algal  
48 symbiosis is driven by solar energy and acts as the biological engine fueling the reef [2]. Corals  
49 have adapted to capture and maximize light under various environmental conditions, and it has  
50 been suggested that they are among the most efficient photosynthetic organisms at utilizing  
51 and converting light energy [3–6].

52           However, the symbiotic interaction is susceptible to anthropogenically mediated  
53 changes in environmental conditions [7]. Specifically, the coral-algal symbiosis is affected by  
54 periods of prolonged thermal stress, which can lead to a breakdown of the symbiosis and the  
55 visible paling of corals, known as coral bleaching [8]. Coral bleaching events have increased  
56 in frequency and duration over the last few decades, leading to an unprecedented decline of  
57 coral reefs worldwide [9]. The combined effects of elevated ocean temperatures, ocean  
58 acidification, and intensifying storms, have resulted in a decline in coral growth and  
59 functioning, due to reduced fecundity [10] and recruitment stock [11], reproductive  
60 synchronization breakdown [12], and coral disease outbreaks [13], thereby impairing the  
61 persistence of corals through environmental disturbances [14–16].

62           Most efforts to promote the recolonization of degrading shallow coral reefs have been  
63 focused on shallow-water corals [17]. More recently, it has been considered that mesophotic  
64 coral ecosystems (MCEs; > 30 m) are potential sources of replenishment and sinks for avoiding  
65 disturbances, since they could offer protection from the harmful environmental impacts  
66 encountered by their shallow-reef counterparts [18–20]. However, it has been shown that deep-

67 water reefs can experience impacts from extreme storms and heatwaves, although not at the  
68 same frequency or intensity as in the shallow environments [21–23].

69 Coral morphological plasticity in response to environmental changes, is thought to  
70 enable corals to inhabit a wider range of environments and increase their ability to withstand  
71 disturbances [24–26]. Coral species that are distributed throughout a wide depth range (known  
72 as “depth-generalists”) adjust certain life-history traits in response to differences in irradiance  
73 [27]. It was found that light quantity affects coral morphology and growth rates [28,29],  
74 community composition [30,31], recruitment patterns [32–34], reproduction [35], and  
75 photobiology [27]. For instance, faster-growing species are found in well-lit shallow waters,  
76 while in deeper waters, decreasing levels of photosynthetically active radiation (PAR, 400-700  
77 nm) typically result in reduced linear extension and coral calcification rates [28].

78 Although irradiance is fundamental for coral photosynthesis, excess light can easily  
79 result in photodamage to the photosynthetic apparatus [2]. Corals, therefore, employ a range of  
80 mechanisms to adjust light-harvesting and photosynthesis in response to the ambient light  
81 environment, most commonly by regulating their morphological structure [36,37], chlorophyll-  
82 *a* concentrations and/or cell densities [38,39]. Light-harvesting efficiency in corals is strongly  
83 controlled by the light scattering and absorption properties of coral host and symbionts. The  
84 light-scattering properties of coral host tissue and the aragonite skeleton play a key role in  
85 modulating the *in-hospite* light environment that controls photosynthesis [3,4]. While earlier  
86 coral optics studies have focused on the apparent optical properties (i.e. light field parameters),  
87 recent advances in experimental techniques enable the study of inherent optical properties (e.g.,  
88 absorption and scattering coefficients) which depend on the material properties and structure  
89 of corals and are independent of illumination conditions [40–42]. For some corals, it has been  
90 shown that the high scattering of the living tissue traps light, while the low absorption and

91 scattering of the skeleton redistribute the light that penetrates the living tissue, enabling the  
92 light to reach otherwise shaded living tissue [41].

93         The broad array of morphological forms found in corals indicates potentially important  
94 consequences in regard to regulation of the optical properties of the individual coral species  
95 [5,29,36]. In MCEs, corals can be found thriving at the PAR limits (0.1-1% of surface  
96 irradiance; see Tamir *et al.* 2019), which suggests that they have developed strategies to cope  
97 with and adjust to such extreme light habitats. Compared to shallow-water corals, those  
98 inhabiting mesophotic reefs exhibit unique characteristics that optimize photosynthetic  
99 efficiency [43–45]. Corals maximize their surface area at the morphological level to primarily  
100 laminar, plate-like morphologies allowing for a maximized light capture [43,46]. Furthermore,  
101 it has been suggested that fluorescent proteins can also promote the adaptation to low-light  
102 environments, by converting blue light into orange-red light, which can penetrate deeper within  
103 the coral tissues [43,47]. However, due to the previous inaccessibility of MCEs, our  
104 understanding of the bio-optical properties and ecophysiology of mesophotic corals are  
105 preliminary.

106         Here, we studied the ecophysiology and bio-optical properties of four widely depth-  
107 distributed coral species from shallow (5-10 m) and mesophotic (40-45 m) depths in the Gulf  
108 of Eilat/Aqaba, Red Sea. We aimed to elucidate the bio-optical mechanisms that enable corals  
109 to adapt to low-light environments, and hypothesized that corals in mesophotic environments  
110 would display bio-optical properties optimized to absorb low-light. Specifically, we employed  
111 a combination of techniques to study the photophysiology, *in-vivo* light field parameters, and  
112 the inherent optical properties of corals. The results of this study present an explanation of the  
113 processes that drive the photobiology and ecophysiology of mesophotic corals and shed light  
114 on how mesophotic corals may respond to environmental stress.

115

## 116 **Results**

### 117 **Biometric assays**

118 Algal pigmentation and density varied among species and within depths, with  
119 mesophotic specimens exhibiting an increase in pigmentation, as visible in the darker colored  
120 tissues (Fig. 1). Algal symbiont density (cells cm<sup>-2</sup>) was on average three-fold higher in the  
121 mesophotic corals than in their shallow counterparts (MEPA,  $p < 0.001$ ; Fig. 2a), with the  
122 highest cell count measured in the mesophotic *P. lobata* at  $6.57 \times 10^5 \pm 1.11 \times 10^5$  cells per cm<sup>2</sup>.  
123 Likewise, chlorophyll-*a* content ( $\mu\text{g cm}^{-2}$ ) was enhanced in mesophotic vs. shallow specimen  
124 (0.41-2.75 vs 0.014-0.94  $\mu\text{g cm}^{-2}$ , respectively; MEPA,  $p < 0.01$ ; Fig. 2b). Overall, chlorophyll-  
125 *a* content per cell (pg cell<sup>-1</sup>) was higher in mesophotic corals (MEPA,  $p < 0.05$ ; Fig. 2c), except  
126 for *S. pistillata* which exhibited similar concentrations between depths ( $Hg = -0.03$  [CI<sub>95%</sub> -  
127 0.99; 0.99]).

128

### 129 **Photosynthetic parameters**

130 The maximum quantum yield of PSII ( $F_v/F_m$ ) was significantly higher for mesophotic  
131 species (MEPA,  $p < 0.05$ ) compared to their shallow-water counterparts ( $F_v/F_m = 0.50$ - $0.72$   
132 and  $0.19$ - $0.65$ , respectively;  $p < 0.05$ ), with shallow *P. lobata* exhibiting 50% lower  $F_v/F_m$   
133 values compared to all other shallow-water specimens (Fig. 2d). Areal net photosynthesis  
134 ( $\mu\text{mol O}_2 \text{ cm}^{-2} \text{ h}^{-1}$ ) differed between branching species, as well as between depths within  
135 species (MEPA,  $p < 0.05$ ). On average, the light-use efficiency ( $\alpha$ ) of areal net photosynthesis  
136 was three-fold higher for mesophotic corals compared to shallow-water corals (MEPA,  $p <$   
137  $0.05$ ; Fig. 3a, e). *S. pistillata* corals displayed the largest differences in  $\alpha$  between depths, with  
138 values nine-fold higher in the mesophotic specimen than in their shallow-water counterparts  
139 ( $6.43 \times 10^{-2} \pm 3.33 \times 10^{-2}$  vs  $7.43 \times 10^{-3} \pm 1.66 \times 10^{-3}$ , respectively, Fig. 3a). Areal  $P_{MAX}$  was  
140 enhanced for mesophotic corals compared to shallow ones, as can be seen for example in the

141 two-fold higher  $P_{MAX}$  in mesophotic *A. squarrosa* corals ( $Hg = 1.63$  [CI<sub>95%</sub> 0.774; 3.18]).  
142 Moreover,  $P_{MAX}$  for mesophotic corals was achieved at almost one order of magnitude greater  
143 than in their ambient light environment (i.e., ~300 vs ~45  $\mu\text{mol photons m}^{-2} \text{s}^{-1}$ , Fig. 1i). All  
144 mesophotic specimens displayed significantly lower  $E_K$  values than their shallower  
145 counterparts (MEPA,  $p < 0.01$ ). In contrast to areal photosynthesis, cell-specific maximal rates  
146 in shallow *S. pistillata* exceeded those of their mesophotic counterparts by 30% (Table S1).  
147 The normalization for cell density also led to similar  $P_{MAX}$  values between shallow and  
148 mesophotic *A. squarrosa* ( $Hg = 0.66$  [CI<sub>95%</sub> -0.66; 1.82]). The normalization of O<sub>2</sub> production  
149 per unit cellular chlorophyll-*a* ( $\mu\text{mol O}_2 \text{ pg chl-}a^{-1} \text{ s}^{-1}$ ) resulted in over two-fold greater  $\alpha$  values  
150 for mesophotic corals (Table S1) and approximately 35% higher  $P_{MAX}$  for shallow corals  
151 (MEPA,  $p < 0.05$ ; Fig. 3c,g).

152  $P$  vs  $E_d$  was corrected for the *in vivo* photon scalar irradiance ( $E_0$ ; PAR integrated over  
153 400-700 nm) for all the photosynthetic parameters. This correction resulted in an over 50%  
154 increase in  $E_K$  values ( $E_d$ ; Table S1). For example, in shallow *A. squarrosa* corals, light  
155 saturation levels of  $P$  vs  $E_0$  reached ~180% of the  $P$  vs  $E_d$  ( $368.43 \pm 79.40$  and  $206.73 \pm 43.47$   
156  $\mu\text{mol photons m}^{-2} \text{s}^{-1}$ , respectively), whereas, in mesophotic corals,  $E_K$  reached ~140% of the  
157 incident downwelling irradiance ( $91.85 \pm 5.04$  and  $65.19 \pm 3.03 \mu\text{mol photons m}^{-2} \text{s}^{-1}$ ,  
158 respectively; Fig. 3). There was no significant trend in dark respiration between all species and  
159 depths (Table S2; Fig. 3a, e). For massive coral species, no clear differences were found in  
160 photosynthetic parameters (Table S1).

161

## 162 **Bio-optical properties**

163 Scalar irradiance ( $E_0$ ) at the coral tissue surface differed among species and depths for  
164 both tissue areas (i.e., coenosarc and polyp). Shallow corals exhibited 22% and 33% higher  $E_0$   
165 at 675 nm than mesophotic corals for coenosarc and polyp areas, respectively (MEPA,  $p <$

166 0.001; Fig. 4a-d). Scalar irradiance was consistently higher over the coenosarc tissue than over  
167 the polyp tissue in both shallow and mesophotic *S. pistillata* corals (Fig. 4d), whereas  $E_0$   
168 differences between these areas in *P. lobata* varied only between depths, i.e., coenosarc was  
169 higher in shallow corals and lower in their mesophotic counterparts (Fig. 4c). Attenuation of  
170 PAR from tissue surface towards the skeleton was greater in mesophotic corals and was most  
171 pronounced in *P. peresi*, with  $E_0$  reaching down to 24% of  $E_d$  (Fig. S1).  $E_0$  at the tissue-skeleton  
172 interface was approximately two-fold higher for shallow corals compared to mesophotic corals  
173 (MEPA,  $p < 0.001$ ), ranging from  $49.00 \pm 0.88\%$  to  $158 \pm 4.15\%$  (mean  $\pm$  SE; at 675 nm) of  
174 the incident downwelling irradiance. Intra-tissue measurements were not performed in *P.*  
175 *lobata* due to their extremely thin tissue.

176 Skeleton scalar irradiance over corallite (polyp skeleton) areas of shallow and  
177 mesophotic corals were higher than over the coenosarc (MEPA,  $p < 0.001$ ). For example,  
178 shallow *S. pistillata* corals exhibited nearly 50% higher skeleton scalar irradiance over corallite  
179 than over coenosarc, contrasting the pattern observed for intact corals (Fig. 4d). Compared to  
180 mesophotic corals, both the shallow massive coral species exhibited significantly 15% lower  
181 scalar irradiance over coenosarc (*P. peresi*:  $Hg = 1.95$  [CI<sub>95%</sub> 1.56; 2.34]; *P. lobata*:  $Hg = 1.81$   
182 [CI<sub>95%</sub> 1.6; 2.04]), while no significant differences were found in the branching corals between  
183 depths.

184 The spectral diffuse reflectance (%) of corals varied among species, depths, and  
185 between live (tissue) and skeleton surfaces (MEPA,  $p < 0.001$ ; Fig 4e-f). Tissue reflectance  
186 was systematically higher for shallow corals and ranged between  $14.80 \pm 0.26\%$  to  $25.20 \pm$   
187  $0.36\%$  compared to  $6.36 \pm 0.10\%$  to  $14.70 \pm 0.40\%$  for their mesophotic counterparts (in  $\lambda =$   
188 675nm; Fig. 4e, f). Excluding *A. squarrosa*, coral skeletons from the mesophotic reflected up  
189 to 57% more light than their shallow counterparts ( $Hg = -1.71$  [CI<sub>95%</sub> -1.91; -1.52]; Fig. 4e).



190 The extracted algal absorption coefficient ( $\mu_{a\_algae}$ ;  $\text{cm}^{-1}$ ) for the four coral species  
191 ranged between 0.09 to 1.18  $\text{cm}^{-1}$  at 675 nm (Fig. 5a-d, S2; Table 1). A comparison of shallow  
192 and mesophotic  $\mu_{a\_algae}$  revealed that for most mesophotic specimens  $\mu_{a\_algae}$  was at least two-  
193 fold greater. The largest difference was found for *A. squarrosa* with an approximate eight-fold  
194 enhancement in  $\mu_{a\_algae}$  for mesophotic versus shallow corals. Skeletal optical parameters were  
195 extracted from the radial attenuation of the fluence rate at 720 nm (Fig. S3). Skeletal absorption  
196 was approximately two-fold higher in shallow versus mesophotic branching corals and was  
197 highest in the shallow *P. lobata* displaying 0.51  $\text{cm}^{-1}$  (Fig. S4). The skeletal reduced scattering  
198 coefficient at 720 nm was relatively similar between shallow and mesophotic *S. pistillata*  
199 (15.12 and 13.5  $\text{cm}^{-1}$ , respectively). In contrast, shallow *A. squarrosa*, *P. peresi*, and *P. lobata*  
200 demonstrated over two-fold higher  $\mu_s$  compared to the mesophotic corals. Monte Carlo  
201 simulations used the extracted IOPs to calculate tissue absorption and showed that mesophotic  
202 *A. squarrosa* and *P. lobata* corals absorbed over 80% of the flux in the tissue compared to 25-  
203 30% in the respective shallow corals. In contrast, this depth-dependent difference in flux  
204 absorption was less pronounced for *S. pistillata* and absorption was only about 15% greater in  
205 mesophotic corals (Table 1).

206

## 207 Discussion

208 Understanding the ability of corals to grow and thrive under extreme low light is a key  
209 question in the study of mesophotic coral ecosystems [48]. In line with our hypothesis, the  
210 findings indicate that mesophotic corals have bio-optical properties optimized to absorb low-  
211 light. Our findings revealed up to three-fold enhanced light absorption by mesophotic corals  
212 (Fig. 5, Table 1) and an outstanding photosynthetic response under a range of light conditions  
213 (Fig. 3).

214 We found that for all mesophotic corals, except for *A. squarrosa*, PAR reflectance from  
215 coral skeletons was enhanced by up to 30% higher compared to shallow corals (Fig. 4). This  
216 shows that greater skeletal reflectance enhances light-harvesting by its photosymbionts [3], as  
217 exhibited by most mesophotic corals compared to their shallow counterparts (Fig. 4). We also  
218 detected a strong upregulation of light-absorbing pigments in all mesophotic coral tissues, due  
219 to both a higher algal cell density and enhanced chlorophyll-*a* per cell (Fig. 2), resulting in up  
220 to one order of magnitude higher algal absorption coefficients for mesophotic versus shallow-  
221 water corals (Fig. 5, Table 1). Such marked differences in algal absorption coefficient have not  
222 been previously characterized and indicate the presence of highly adapted light-harvesting  
223 complexes to low-light conditions. This is supported by earlier studies on mesophotic  
224 photobiology, demonstrating both an increase in the effective antenna size (i.e., antenna  
225 pigments) per photosynthetic unit (PSU) and an increase of PSUs per cell [44,49].

226 Although the upregulation of photosynthetic pigments can naturally give rise to algal  
227 self-shading [3], microscopic light sensor measurements inside the tissue of mesophotic corals  
228 revealed that the light available at the tissue-skeleton interface is surprisingly high, leaving  
229 approximately one-fourth of the incident light after photon absorption (Fig. S1). It is possible,  
230 therefore, that the enhanced skeletal reflectance acts as an effective strategy counterbalancing  
231 the effects of self-shading, by upregulating the diffuse light available from the skeleton to  
232 compensate for higher cell densities.

233 We further found spatial differences in the microscale distribution of light between  
234 intact corals and bare skeletons (Fig. 4). For *S. pistillata* corals, tissue scalar irradiance was up  
235 to 20% lower for polyp than for coenosarc tissue, similar to previous measurements in other  
236 coral species characterized by small polyps [4]. The reduced light intensity for polyp tissues  
237 matches the spatial distribution of endosymbionts with higher cell densities in polyp tissues  
238 than in coenosarc tissues (see Fig. 1a,e). Interestingly, the irradiance distribution for the bare

239 skeleton surface showed opposite patterns, indicating enhanced skeletal scattering within the  
240 polyp corallite than over the coenosarc. Therefore, enhanced light scattering within the corallite  
241 effectively assists in light dissipation to the dense microalgae inside the tissue. The high content  
242 of light-absorbing pigments within the polyp tissue (Fig. 4) suggests an increased biological  
243 activity of the coral polyp, and thus would require more light to support photosynthesis. Light  
244 availability within the corallite was strongly enhanced (Fig. 1S) which can be explained by  
245 intense scattering from the corallite skeletal walls toward its center [50], with additional light  
246 being transported to the polyp through the coenosteum [41]. Thus, the spatial distribution of  
247 the coral skeleton scattering and symbiont densities further support our hypothesis of a coral  
248 controlled finely tuned system of light scattering and light absorption.

249 Generally, both mesophotic *A. squarrosa* and *S. pistillata* corals utilized light more  
250 efficiently than their shallow counterparts, as indicated by steeper initial slopes of the *P-E*  
251 curves (Fig. 3a,d). For example, in *A. squarrosa* corals, the predicted net photosynthesis at a  
252 typical mid-day irradiance of 40-50  $\mu\text{mol photons m}^{-2} \text{s}^{-1}$  in 45 m (Fig. 1i) was shown to be  
253 six-fold higher in mesophotic versus shallow depths (Fig. 3a). Still, we found species-specific  
254 differences in photosynthetic rates. Upon normalizing  $P_n$  to algal cell density, *S. pistillata*  
255 revealed a typical light-shade response between depths (Fig. 3e), i.e., lower  $P_{MAX}$  and  $E_K$  values  
256 for mesophotic individuals [39,49]. In contrast, *A. squarrosa* did not follow this pattern and  
257 mesophotic corals exhibited higher  $P_{MAX}$  and  $E_K$  values when photosynthetic rates were  
258 normalized to cell density (Fig. 3b). However, when *P-E* curves were calculated based on  
259 chlorophyll-*a* content, *A. squarrosa* displayed a typical light-shade response, similar to *S.*  
260 *pistillata* (Fig. 3c,f).

261 The extraction of the inherent optical properties of corals allowed for a novel  
262 development of a probability distribution model that predicts the total flux absorbed within the  
263 photosynthetic coral tissue of shallow and mesophotic corals (Fig. 5, Table 1). The combination

264 of increased reflectivity, high algal absorption coefficient, and low  $\mu_s'$  (i.e., higher lateral  
265 spread of light) facilitated a strikingly higher total absorbed flux by mesophotic corals as  
266 compared with shallow ones. The mesophotic *A. squarrosa* and *P. lobata* showed  
267 approximately three-fold higher flux absorption than the shallower counterparts, whereas for  
268 *S. pistillata* there was only a ~20% difference between shallow and mesophotic specimen  
269 (Table 1). These findings indicate that in contrast to *A. squarrosa*, *S. pistillata* corals show  
270 light-regulated host modifications, as also supported by the pronounced differences in scalar  
271 irradiance between corallite and coenosarc areas, as well as between depths (Fig. 4d).  
272 Moreover, minor skeletal scattering differences between depths may be explained by micro-  
273 architectural modifications that compensate for changes in the skeletal material properties at  
274 mesophotic depths, as recently reported for this species [55]. This supports the notion that the  
275 ability of *S. pistillata* to adapt to different light regimes is not limited by its photosymbionts  
276 [53].

277 It is important to note that the energetic demands required to sustain coral growth at  
278 low-light can be further achieved through supplementation derived from heterotrophy (e.g.,  
279 predation of zooplankton) [52]. However, since heterotrophic feeding is thought to be species-  
280 specific, the strategy of increased reliance on heterotrophy versus autotrophy with depth does  
281 not appear to be a primary trophic strategy for some depth-generalists, and particularly not in  
282 deep-water specialists [45]. The photosynthetic and growth efficiencies of the strictly  
283 mesophotic *Leptoseris* species, for example, were shown to be facilitated mainly by their  
284 skeletal optical geometry [45].

285 The advantage of low-light optimized bio-optical properties in mesophotic corals may  
286 prove to be their weakness in times of thermal stress. Although considered a relatively stable  
287 environment, MCEs can experience extreme heat-waves that lead to coral bleaching [22].  
288 During bleaching in shallow corals, it has been shown that endosymbiotic algae are exposed to

289 enhanced irradiance from skeletal backscattering, which can further stimulate symbiont loss, a  
290 hypothesis referred to as the “optical-feedback loop” [42,50]. Different factors have been  
291 shown to be related to enhanced bleaching susceptibility, such as lower  $\mu_s$ ’ [42,54], enhanced  
292 skeletal reflectivity [50], and high photosymbiont densities [56], all of which have been  
293 demonstrated here by the mesophotic specimen (Fig. 3,5,6). Hence, the combination of these  
294 factors suggests that mesophotic corals are more susceptible to bleaching than their shallower  
295 counterparts. In an era of rapid climate change, it is therefore critical to assess the effects of  
296 thermal stress on mesophotic corals.

297         Thermal stress, however, is only one of many contemporary threats that coral reefs must  
298 face in a changing climate. Ocean acidification, in particular, was shown to impair the capacity  
299 of corals to build their skeletons through calcification [57,58]. An effective dissipation of light  
300 from the coral relies on a proper balance between the skeletal scattering and absorption,  
301 however, increased porosity and skeletal deformation caused by ocean acidification [59] are  
302 likely to disturb this balance. The light-harvesting process achieved by skeletal light scattering  
303 may become compromised as a result, leading to far-reaching ecological consequences caused  
304 by the coral’s inability to regulate light and impaired mechanical integrity. Given that corals  
305 are the main bioengineers in coral reefs, a reduction in coral growth will diminish the  
306 structurally complex habitat needed for numerous species [60]. Unfortunately, in times of  
307 change, this negative effect may be more pronounced in MCEs, since mesophotic corals could  
308 be more vulnerable and express limited and/or slower adaptability [22]. Notwithstanding the  
309 importance of corals as bioengineers, research focusing on the effects of altered environmental  
310 parameters on the bio-optical properties of corals has not received sufficient study to date, and  
311 more research is needed to determine the impact of projected near-future acidification levels,  
312 coupled with other significant environmental factors.

313 In conclusion, we present bio-optical mechanisms employed to sustain coral growth in  
314 extreme low-light environments, and expand the current knowledge on mesophotic  
315 photobiology. Light-harvesting in mesophotic corals is facilitated by the combination of  
316 pigment upregulation and enhanced skeletal reflectance. The light-harvesting strategies  
317 employed by mesophotic corals enhanced the absorbed flux by up to three-fold compared to  
318 their shallow counterparts, suggesting a spatially efficient photosymbiotic system. The results  
319 of this study further suggest that such light harvesting strategies make mesophotic corals  
320 specifically susceptible to environmental change and highlight the importance of integrating  
321 bio-optics and ecology to predict the future response of coral reef ecosystems to climate  
322 change.

323

#### 324 **Author contributions**

325 N.K., Y.L., and D.W. conceived and designed the study; N.K., R.T., and D.W. collected the  
326 corals; N.K., R.T., O.B.Z, and D.W. performed research; N.K., S.L.J, and D.W. analyzed the  
327 data; N.K. wrote the manuscript with contributions and final approval from all authors.

328

#### 329 **Acknowledgments**

330 We thank the Interuniversity Institute for Marine Sciences in Eilat (IUI) for making their  
331 facilities available, and their staff for excellent assistance. O. Levy, D. de Beer, and T. Treibitz  
332 are thanked for lending equipment. This work was supported by the Israel Science Foundation  
333 (ISF) Grant No. 1191/16 to Y.L., the European Union's Horizon research and innovation  
334 program under grant agreement No. 730984, and by the ASSEMBLE-Plus consortium grant to  
335 D.W.

336

337

338 **Figure Legends**

339 **Figure 1. Morphotypes of depth-generalist corals and PAR profile.** Studies species from  
340 shallow (5-10 m; **a-d**) and mesophotic (40-45 m; **e-h**) depths, at colony level and polyp-  
341 coenosarc level (insets; scale bars = 0.5 and 1 mm in branching and massive corals,  
342 respectively). Insets were taken using the same optical microscope settings. **(i)** Mid-day  
343 photosynthetic active radiation (PAR;  $\mu\text{mol photon m}^{-2} \text{ s}^{-1}$ ) as a function of depth (m) in  
344 February, measured off the interuniversity institute for marine sciences in Eilat. Shallow (5-10  
345 m; *light-blue*) and mesophotic (40-45 m; *dark-blue*) are shown as horizontal dotted lines, with  
346 a corresponding range of PAR values (*red*).

347

348 **Figure 2. Biometric assays.** Microalgal symbiont density **(a)**, chlorophyll-*a* density **(b)**,  
349 cellular chlorophyll-*a* **(c)**, and  $F_v/F_m$  **(d)** for four depth-generalist coral species from shallow  
350 water (5-10 m; *light-blue*) and mesophotic water depths (40-45 m; *dark-blue*). Box plots depict  
351 the median (horizontal line), interquartile range (first and third quartiles), and whiskers as  $\pm 1.5$   
352 interquartile range with dots representing outliers ( $n = 9-27$  repetitions per species per depth).

353

354 **Figure 3. O<sub>2</sub> production for *A. squarrosa* (a-c) and *S. pistillata* (e-g) from shallow (5-10 m;**  
355 ***light-blue*) and mesophotic (40-45 m; *dark-blue*) depths.** O<sub>2</sub> production is shown as areal net  
356 photosynthesis ( $\mu\text{mol O}_2 \text{ cm}^{-2} \text{ h}^{-1}$ ; **a, e**), with gray dashed line represents 0 net photosynthesis;  
357 gross photosynthesis per algal cell ( $\mu\text{mol O}_2 \text{ cell}^{-1} \text{ h}^{-1}$ ; **b, f**); and gross photosynthesis per  
358 chlorophyll content ( $\mu\text{mol O}_2 \text{ pg chl-}a^{-1} \text{ h}^{-1}$ ; **c, g**). Each photosynthetic measurement (*P*) was  
359 performed as a function of the downwelling photon irradiance ( $E_d$ ; solid lines and filled circles)  
360 and of scalar photon irradiance ( $E_0$ ; dashed lines and hollow circles) spanning eight irradiance  
361 levels. Curves were fit using a double exponential decay model [61]. Data points represent  
362 mean  $\pm$  standard error ( $n = 9$  repetitions per species per depth). Note that the *x,y* scales for *A.*  
363 *squarrosa* and *S. pistillata* have been adjusted for clarity.

364

365 **Figure 4. Apparent optical properties at 400-700 nm.** Coral scalar photon irradiance ( $E_0$ ; %  
366 incident irradiance) at the tissue and skeleton surfaces, measured over the coenosarc (solid  
367 lines) and the polyp/corallite (dashed lines) areas (**a-d**). Normalized spectral reflectance of light  
368 ( $R_d(\lambda)$ ; %) over the coral tissue and skeleton surfaces (**e-h**). Tissue surfaces are colored in blue  
369 shades (*light-blue* and *dark-blue* for shallow and mesophotic corals, respectively), and skeleton  
370 surfaces are colored in warm shades (*orange* and *dark-red* for shallow and mesophotic corals,  
371 respectively). Data are mean (thick lines)  $\pm$  standard error (thin lines);  $n = 15-45$  repetitions per  
372 species per depth.

373



374 **Figure 5. Inherent optical properties.** Algal absorption coefficient  $\mu_{a\_algae}$  ( $\text{cm}^{-1}$ ) of isolated  
375 microalgae at 675 nm as a function of microalgae density for shallow (*light-blue*) and  
376 mesophotic (*dark-blue*) samples (**a-d**). Coral skeletal scattering ( $\mu_s'$ ) and absorption coefficient  
377 ( $\mu_a$ ) between 500-750 nm (data points) plotted against measured  $R_d$  for shallow and mesophotic  
378 (hollow and filled circles, respectively; colors denote species) (**e**).

379

## 380 **Tables**

381 **Table 1.** Inherent optical properties extracted from intact live corals (live at 675 nm) and bare  
382 skeletons (at 720 nm) using diffusion theory: tissue and skeletal absorption coefficient ( $\mu_a$  [ $\text{cm}^{-1}$ ],  
383 and skeletal scattering coefficient ( $\mu_s'$  [ $\text{cm}^{-1}$ ]). The predicted absorbed flux (watt per  $\text{cm}^{-2}$   
384 per watt delivered) of the tissue affected by the optical parameters was derived from Monte  
385 Carlo simulations.

| Species              | Depth      | $\mu_a$<br>(tissue) | $\mu_a$<br>(skeleton) | $\mu_s'$<br>(skeleton) | Absorbed<br>flux |
|----------------------|------------|---------------------|-----------------------|------------------------|------------------|
| <i>A. squarrosa</i>  | Shallow    | 0.09                | 0.40                  | 36.00                  | 0.25             |
|                      | Mesophotic | 0.81                | 0.22                  | 12.84                  | 0.82             |
| <i>P. lobata</i>     | Shallow    | 0.17                | 0.51                  | 35.66                  | 0.30             |
|                      | Mesophotic | 0.87                | 0.08                  | 15.57                  | 0.87             |
| <i>S. pistillata</i> | Shallow    | 0.66                | 0.47                  | 15.12                  | 0.75             |
|                      | Mesophotic | 1.18                | 0.27                  | 13.50                  | 0.89             |

386

387

388

389

390

391

392

393

## STAR METHODS

394

### RESOURCE AVAILABILITY

395

#### Lead Contact

396

Requests for further information and data should be directed to and will be fulfilled by the lead

397

contact, Netanel Kramer ([nati.kramer@gmail.com](mailto:nati.kramer@gmail.com))

398

399

#### Materials Availability

400

This study did not generate new unique materials.

401

402

#### Data and Code Availability

403

All datasets generated and/or analyzed during the study are available from the lead contact

404

upon request.

405

406

## EXPERIMENTAL MODEL AND SUBJECT DETAILS

407

### Coral collection and maintenance

408

Mature intact colonies of four depth-generalist coral species were chosen for a

409

comparative study between shallow and mesophotic water specimens. We selected two

410

branching coral species (*Stylophora pistillata* and *Acropora squarrosa*), and two massive coral

411

species (*Paramontastrea peresi* and *Porites lobata*) based on their contrasting skeletal

412

morphologies and their occurrence across a large depth gradient [29,30]. Coral colonies ( $n = 3$

413

per species per depth) were collected using recreational and technical diving at shallow (5-10

414

m) and mesophotic (40-45 m) depths, respectively, from the Gulf of Eilat/Aqaba, the Red Sea.

415

Conspecific colonies were collected at least five meters apart to avoid sampling clonemates.

416

Colonies were maintained in outdoor open-circuit seawater tables at the Interuniversity

417

Institute (IUI) in Eilat. Mesophotic colonies were kept in separate seawater tables under a blue

418 light filter (Lagoon blue, Lee filters, UK) creating the spectral composition and intensity of  
419 irradiance at 45 m depth, while shallow corals were exposed to ambient sunlight. Downwelling  
420 irradiance was monitored to ensure that the light levels reflected the ambient conditions in  
421 which corals had been collected.

## 422 **METHOD DETAILS**

### 423 **Biometric measures**

424 To determine microalgal cell density and chlorophyll-*a* content, coral tissue was  
425 removed using an airbrush at high pressure with 0.2  $\mu\text{m}$  filtered seawater. Tissue-stripped  
426 fragments were bleached in a 6% sodium hypochlorite solution for 24 hours, then rinsed in  
427 freshwater for 10 minutes, and left to air dry. The bleached skeletons would be used later in  
428 the optical analyses. The microalgae fraction was separated from the host tissue using a  
429 motorized homogenizer and centrifugation (5000 rpm for 5 min). Following isolation, samples  
430 were immediately stored in a  $-80^{\circ}\text{C}$  freezer for later analyses. Microalgal cell counts were  
431 determined using a hemocytometer on five replicate micrographs (scaled  $0.1\text{ mm}^3$ ). Cell counts  
432 were normalized to the coral surface area to quantify areal algal density ( $\text{cells cm}^{-2}$ ).  
433 Chlorophyll-*a* was extracted from the remaining algae using 100% cold acetone for 15 h at  $4^{\circ}\text{C}$   
434 and quantified spectrophotometrically [62]. Chlorophyll-*a* was normalized to surface area ( $\mu\text{g}$   
435  $\text{cm}^{-2}$ ) and algae cell ( $\text{pg cell}^{-1}$ ). The volume and surface area of the coral subsamples were  
436 determined with micro-computed tomography ( $\mu\text{CT}$ ). The x-ray scans were conducted with a  
437 Nikon XT H 225ST  $\mu\text{CT}$  (Nikon Metrology Inc., USA) at a resolution of  $50\text{-}\mu\text{m}$  voxels.  
438 Quantitative analysis was performed using Dragonfly software (v. 2020.1, Object Research  
439 Systems (ORS), Inc.).

440

### 441 **Chlorophyll-*a* fluorometry**

442 The maximum quantum yield of PSII ( $F_v/F_m$ ) was measured with an imaging pulse-  
443 amplitude modulated (PAM) chlorophyll-*a* fluorometer (Maxi-PAM, Walz GmbH, Germany).  
444 Coral samples were dark-acclimated for 20 minutes prior to each measurement ( $n = 3$  per  
445 sample). The measured light intensity was adjusted to yield  $F_0$  values in the region of interest  
446 that equal about 0.1 [63].

447

#### 448 **O<sub>2</sub> turnover**

449 Photosynthesis-irradiance ( $P-E$ ) curves were performed for individual samples ( $n = 3$ -  
450 9). Each sample was incubated in a sealed 270 ml acrylic metabolic chamber. The chambers  
451 were placed in a temperature-controlled bath (RTE 210, Thermo Neslab), with constant water  
452 flow at 22°C (i.e., ambient seawater temperature), and a magnetic stirrer maintaining water  
453 movement inside the chamber. A full-spectrum metal halide lamp (400 W, 5000 K, 50 Hz,  
454 Golden-Light, Netanya, Israel) was used to incubate the corals at incident downwelling  
455 irradiance ( $E_d$ ) regimes spanning 0 to 800  $\mu\text{mol photons m}^{-2} \text{s}^{-1}$ .  $E_d$  was measured using a light  
456 meter (LI-250A, Li-Cor, Inc. Lincoln, NE, USA) connected to a cosine-corrected quantum  
457 sensor. O<sub>2</sub> evolution was monitored within each chamber using O<sub>2</sub> optodes connected to an O<sub>2</sub>  
458 meter (ProODO Optical Dissolved Oxygen meter, YSI Inc., OH, USA). Areal net  
459 photosynthesis ( $P_n$ ) was calculated from the difference between final and initial O<sub>2</sub>  
460 measurements ( $\Delta\text{O}_2$ ) for each session after 20 minutes under each light intensity. The  $P-E$  data  
461 were fit to a double exponential decay function to characterize the photosynthetic efficiency  
462 ( $\alpha$ ), the maximal photosynthesis rate ( $P_{MAX}$ ), and the minimum saturation irradiance ( $E_K$ ) [61].  
463 Furthermore, photosynthetic rates were normalized to symbiont cell density and chlorophyll-*a*  
464 content to examine the role of the coral host optics in affecting photosynthetic efficiency. Cell-  
465 specific gross photosynthetic rates ( $\mu\text{mol O}_2 \text{ cell}^{-1} \text{s}^{-1}$ ) were based on the assumption that light  
466 respiration was up to 1.5-fold higher than dark respiration [50].

467

468 ***Apparent optical properties (AOPs)***

469 Spectral scalar irradiance  $E_o(\lambda)$  and diffuse reflectance  $R_d(\lambda)$  were measured for intact  
470 corals and the bare skeletons of each individual. Measurements were performed in a black  
471 acrylic flow chamber. Fiber-optic scalar irradiance microprobes with a tip diameter of 50-100  
472  $\mu\text{m}$  (Zenzor, Denmark) were used to measure the surface and intra-tissue light  
473 microenvironment as described previously [4]. The microsensors were connected to a  
474 spectrometer (AvaSpec-UL2048XL, Avantes, USA) and data were recorded with commercial  
475 software (Avasoft 8.0, Avantes, USA).  $E_o(\lambda)$  was normalized to the incident downwelling  
476 irradiance  $E_d(\lambda)$ , which was measured under an identical configuration as the experimental  
477 coral measurements [4].

478 Spectral reflectance  $R_d(\lambda)$  was measured with a flat-cut fiber-optic reflectance probe  
479 (diameter = 0.2 cm, Ocean optics, USA) connected to a portable spectrometer (JAZ, Ocean  
480 optics, USA). For each measurement, the probe was positioned at 5 mm from the coral/skeleton  
481 surface and at a  $45^\circ$  angle relative to the surface [64]. Incident irradiance was provided by a  
482 tungsten halogen lamp (Schott ACE 1, Germany) equipped with a collimating lens.  
483 Measurements were taken on five randomly chosen areas per coral. Experimental  
484 measurements were normalized against a measurement performed on a 99% diffuse reflectance  
485 standard (Spectralon, Labsphere USA). Although skeletons were bleached, the reflectance  
486 spectrum in the peridinin-chlorophyll-protein complex and chlorophyll-*a* wavebands (490-500  
487 and 675 nm, respectively) were slightly affected by pigment residuals (presumably from  
488 remaining endolithic algae). Nevertheless, this did not affect the interpretation of the results.

489

490 ***Inherent optical properties (IOPs)***

491 The transfer of light in corals is described by the radiative transfer equation (RTE). However,  
492 the RTE is difficult to solve analytically. In most scattering dominating systems, the RTE can  
493 be simplified and expressed as a diffusion dominated process, where optical energy diffuses  
494 according to the diffusion equation [65]. Farrell et al. (1992) developed a steady-state diffusion  
495 equation for light transport in a semi-infinite planar geometry, where the diffuse reflectance  $R$   
496 leaving the boundary at a given distance  $\rho$  from the source is:

497

$$498 \quad R_{(\rho)} = \frac{a'}{4\pi} \left[ \frac{1}{\mu_t'} \left( \mu_{eff} + \frac{1}{r_1} \right) \frac{\exp(-\mu_{eff} r_1)}{r_1^2} \right] + \left( \frac{1}{\mu_t'} + \frac{4A}{3\mu_t'} \right) \times \left( \mu_{eff} + \frac{1}{r_2} \right) \frac{\exp(-\mu_{eff} r_2)}{r_2^2} \quad (1)$$

499

500 where  $\mu_{eff}$  is the effective attenuation coefficient:

$$501 \quad \mu_{eff} = 3\mu_a \sqrt{(\mu_a + \mu_s')} \quad (1.1)$$

502

503  $a'$  is the transport albedo:

$$504 \quad a' = \frac{\mu_s'}{(\mu_a + \mu_s')} \quad (1.2)$$

505  $\mu_t$  is the total interaction coefficient:

$$506 \quad \mu_t = \mu_a + \mu_s' \quad (1.3)$$

507

508 And  $r_1$  and  $r_2$  are radial distances of one mean free path inside the medium and above the  
509 medium where total fluence equals 0, respectively [66]. The optical properties  $\mu_s'$  and  $\mu_a$   
510 uniquely determine the shape of the diffuse reflectance curve. By measuring the lateral spread  
511 ( $r$ ) of reflected light ( $R$ ) it is thus possible to predict unique values of  $\mu_s'$  and the absorption  
512 coefficient  $\mu_a$  that generated the reflectance profile. The fitting procedure uses the  
513 `fminsearch.m` routine in Matlab (Mathworks, USA) which calls a multidimensional  
514 unconstrained non-linear minimization algorithm (Nelder–Mead) to minimize the sum of

515 squares error [41,67]. Optical extraction of  $\mu_s'$  and  $\mu_a$  were performed for intact corals at  
516 wavelengths of strong chlorophyll-*a* absorption (at 663 nm) as well as in the near-infrared (at  
517 750nm), which is free from pigment absorption.

518 We extracted scattering ( $\mu_s'$ ) and absorption ( $\mu_a$ ) coefficients [68] from intact corals  
519 and skeletons by measuring the lateral spread of reflected light ( $R_r$ ). Measurements were  
520 performed with a flat cut light-emitting source fiber (diameter = 0.2 cm, Ocean optics, USA)  
521 connected to a tungsten halogen lamp (LS-1, Ocean Optics, USA) and a flat-cut light collecting  
522 fiber (diameter = 50  $\mu$ m, Zenzor, Denmark) connected to a spectrometer (AvaSpec-  
523 UL2048XL, Avantes, USA). Both fibers were mounted on micromanipulators (Pyroscience  
524 GmbH, Germany and Märtzhäuser, Germany) and aligned parallel to each other at a minimum  
525 lateral distance of 4 mm perpendicular to and in direct contact with the coral surface. A  
526 stereomicroscope (SZ51, Olympus) was used to carefully position the fiber optic probes at the  
527 surface.  $R_r$  was measured at lateral steps of 1 mm to a maximum of 10 mm [67]. This procedure  
528 was repeated for five randomly chosen coenosarc areas for each coral sample. Measurements  
529 were conducted on the coenosarc, which had a more even topography and less contractile tissue  
530 compared with the polyp tissue, thus allowing repeated measurements and a more accurate  
531 estimate of horizontal light transfer. The lateral attenuation of light was matched to the  
532 predicted attenuation  $pR_r$  based on diffusion theory [66] and starting values of  $\mu_s'$ ,  $\mu_a$ . The coral  
533 surface architecture for *P. peresi* was very heterogeneous due to the deep corallite architecture,  
534 preventing reliable quantification of  $R(r)$ , and the analysis was thus omitted.

535 Additionally, we characterized the algal cell-specific absorption coefficient ( $\mu_{a\_algae}$ )  
536 of isolated symbionts independent of the host environment. To separate between the effect of  
537 algal absorption and that of algal scattering, diffuse reflectance measurements were performed  
538 in a strongly scattering dominated medium, such that any algal scattering can be regarded as  
539 negligible. Milk is a cost-effective strongly scattering-medium with known optical properties.

540 The lipid content of 100% whole milk is typically 4% lipids and the scattering of intralipid™  
541 in 10% lipids is  $100 \text{ cm}^{-1}$  (at 600 nm). Therefore, the scattering of 100% whole milk is  
542 estimated to be:

$$543 \quad \mu_s'(\lambda)_{milk} = (40 \text{ cm}^{-1}) \left( \frac{\lambda}{600 \text{ nm}} \right)^{-1} \quad (2)$$

544 Reflectance measurements were performed with 100% whole milk and a 1:1 mixture of milk  
545 and algal serial dilutions (from 50% to 3%). Algal cell density was determined as described  
546 above in order to relate  $\mu_{a\_algae}$  to cell density ( $\text{mL}^{-1}$ ). To extract  $\mu_{a\_algae}$  [ $\text{cm}^{-1}$ ] diffusion theory  
547 and nonlinear least-squares fitting were used as described above to match predicted reflectance  
548 to experimentally measured reflectance.

549

### 550 **Monte Carlo modeling of absorbed flux**

551 To characterize differences in light absorption by coral tissues we developed a Monte  
552 Carlo simulation using the inherent optical properties determined via diffusion theory as input  
553 parameters (Fig. 6, Table 1). For each simulation the tissue was 1mm thick and had an  
554 absorption coefficient  $\mu_a$  that was determined by  $\mu_a$  algae at 675 nm. Tissue  $\mu_s'$  was set to  $5 \text{ cm}^{-1}$   
555 for all simulations. Details on the Monte Carlo approach can be found in Wangpraseurt et al.  
556 [41] and Jacques et al [67].

557

## 558 **QUANTIFICATION AND STATISTICAL ANALYSIS**

559 All statistical analyses were performed using the R software (R Core Team 2020). To  
560 estimate ecophysiological and bio-optical variations in the studied species, we modeled the  
561 corresponding parameters (separate test for each parameter) as a function of species and depth,  
562 using mixed-effects permutational analysis (MEPA; 2000 permutations), with coral identity as  
563 a random effect. These analyses were run using the packages {nlme}[70] and



564 {predictmeans}[71]. Pairwise comparisons were based on Hedge's  $g$  ( $Hg$ ) standardized effect  
565 size (preferred over Cohen's  $d$  for small samples) with 95% confidence interval (CI)  
566 constructed from 5000 bootstrap samples, and significance was determined as CI not  
567 overlapping with zero (shallow depth as reference). This analysis was computed using the R  
568 package {dabestr}[72].

569

## 570 **References**

- 571 1. Graham, N.A.J., and Nash, K.L. (2013). The importance of structural complexity in  
572 coral reef ecosystems. *Coral Reefs*.
- 573 2. Roth, M.S. (2014). The engine of the reef: Photobiology of the coral-algal symbiosis.  
574 *Front. Microbiol.* 5, 1–22.
- 575 3. Enríquez, S., Méndez, E.R., and Iglesias-Prieto, R. (2005). Multiple scattering on coral  
576 skeletons enhances light absorption by symbiotic algae. *Limnol. Oceanogr.* 50, 1025–  
577 1032.
- 578 4. Wangpraseurt, D., Larkum, A.W.D., Ralph, P.J., and Kühl, M. (2012). Light gradients  
579 and optical microniches in coral tissues. *Front. Microbiol.* 3, 1–9.
- 580 5. Kahng, S.E., Hochberg, E.J., Apprill, A., Wagner, D., Luck, D.G., Perez, D., and  
581 Bidigare, R.R. (2012). Efficient light harvesting in deep-water zooxanthellate corals.  
582 *Mar. Ecol. Prog. Ser.* 455, 65–77.
- 583 6. Brodersen, K.E., Lichtenberg, M., Ralph, P.J., Kühl, M., and Wangpraseurt, D. (2014).  
584 Radiative energy budget reveals high photosynthetic efficiency in symbiont-bearing  
585 corals. *J. R. Soc. Interface* 11, 20130997.
- 586 7. Hughes, T.P., Kerry, J.T., Baird, A.H., Connolly, S.R., Dietzel, A., Eakin, C.M.,  
587 Heron, S.F., Hoey, A.S., Hoogenboom, M.O., Liu, G., *et al.* (2018). Global warming  
588 transforms coral reef assemblages.

- 589 8. Baker, A.C., Glynn, P.W., and Riegl, B. (2008). Climate change and coral reef  
590 bleaching: An ecological assessment of long-term impacts, recovery trends and future  
591 outlook. *Estuar. Coast. Shelf Sci.* 80, 435–471. Available at:  
592 <http://linkinghub.elsevier.com/retrieve/pii/S0272771408003405> [Accessed March 23,  
593 2017].
- 594 9. Leggat, W.P., Camp, E.F., Suggett, D.J., Heron, S.F., Fordyce, A.J., Gardner, S.,  
595 Deakin, L., Turner, M., Beeching, L.J., Kuzhiumparambil, U., *et al.* (2019). Rapid  
596 Coral Decay Is Associated with Marine Heatwave Mortality Events on Reefs. *Curr.*  
597 *Biol.*, 1–8. Available at:  
598 <https://linkinghub.elsevier.com/retrieve/pii/S0960982219308048>.
- 599 10. Ward, S., Harrison, P., and Hoegh-Guldberg, O. (2000). Coral bleaching reduces  
600 reproduction of scleractinian corals and increases susceptibility to future stress. *Proc.*  
601 *9th Int. Coral Reef Symp.* 2.
- 602 11. Hughes, T.P., Kerry, J.T., Baird, A.H., Connolly, S.R., Chase, T.J., Dietzel, A., Hill,  
603 T., Hoey, A.S., Hoogenboom, M.O., Jacobson, M., *et al.* (2019). Global warming  
604 impairs stock–recruitment dynamics of corals. *Nature*. Available at:  
605 <https://doi.org/10.1038/s41586-019-1081-y>.
- 606 12. Shlesinger, T., and Loya, Y. (2019). Breakdown in spawning synchrony: A silent  
607 threat to coral persistence. *Science* (80-. ). 365, 1002 LP – 1007. Available at:  
608 <http://science.sciencemag.org/content/365/6457/1002.abstract>.
- 609 13. Bruno, J.F., Selig, E.R., Casey, K.S., Page, C.A., Willis, B.L., Harvell, C.D.,  
610 Sweatman, H., and Melendy, A.M. (2007). Thermal Stress and Coral Cover as Drivers  
611 of Coral Disease Outbreaks. *PLOS Biol.* 5, e124. Available at:  
612 <https://doi.org/10.1371/journal.pbio.0050124>.
- 613 14. Ortiz, J.-C., Wolff, N.H., Anthony, K.R.N., Devlin, M., Lewis, S., and Mumby, P.J.

- 614 (2018). Impaired recovery of the Great Barrier Reef under cumulative stress. *Sci. Adv.*  
615 *4*, eaar6127. Available at:  
616 <http://advances.sciencemag.org/content/4/7/eaar6127.abstract>.
- 617 15. Hughes, T.P., Kerry, J.T., Álvarez-Noriega, M., Álvarez-Romero, J.G., Anderson,  
618 K.D., Baird, A.H., Babcock, R.C., Beger, M., Bellwood, D.R., Berkelmans, R., *et al.*  
619 (2017). Global warming and recurrent mass bleaching of corals. *Nature* *543*, 373–377.  
620 Available at: <http://dx.doi.org/10.1038/nature21707>.
- 621 16. Richmond, R.H., Tisthammer, K.H., and Spies, N.P. (2018). The Effects of  
622 Anthropogenic Stressors on Reproduction and Recruitment of Corals and Reef  
623 Organisms. *Front. Mar. Sci.* *5*. Available at:  
624 <https://www.frontiersin.org/article/10.3389/fmars.2018.00226/full>.
- 625 17. Boström-Einarsson, L., Babcock, R.C., Bayraktarov, E., Ceccarelli, D., Cook, N.,  
626 Ferse, S.C.A., Hancock, B., Harrison, P., Hein, M., Shaver, E., *et al.* (2020). Coral  
627 restoration – A systematic review of current methods, successes, failures and future  
628 directions. *PLoS One* *15*, e0226631. Available at:  
629 <https://doi.org/10.1371/journal.pone.0226631>.
- 630 18. Bongaerts, P., Ridgway, T., Sampayo, E.M., and Hoegh-Guldberg, O. (2010).  
631 Assessing the “deep reef refugia” hypothesis: Focus on Caribbean reefs. *Coral Reefs*  
632 *29*, 1–19. Available at: <http://dx.doi.org/10.1007/s00338-009-0581-x>.
- 633 19. Glynn, P.W. (1996). Coral reef bleaching: Facts, hypotheses and implications. *Glob.*  
634 *Chang. Biol.*
- 635 20. Loya, Y., Eyal, G., Treibitz, T., Lesser, M.P., and Appeldoorn, R. (2016). Theme  
636 section on mesophotic coral ecosystems: advances in knowledge and future  
637 perspectives. *Coral Reefs* *35*, 1–9.
- 638 21. Rocha, L.A., Pinheiro, H.T., Shepherd, B., Papastamatiou, Y.P., Luiz, O.J., Pyle, R.L.,

- 639 and Bongaerts, P. (2018). Mesophotic coral ecosystems are threatened and  
640 ecologically distinct from shallow water reefs. *Science* (80-. ). *361*, 281–284.  
641 Available at: <http://www.sciencemag.org/lookup/doi/10.1126/science.aaq1614>.
- 642 22. Pinheiro, H.T., Eyal, G., Shepherd, B., and Rocha, L.A. (2019). Ecological insights  
643 from environmental disturbances in mesophotic coral ecosystems. *Ecosphere* *10*,  
644 e02666. Available at: <https://onlinelibrary.wiley.com/doi/abs/10.1002/ecs2.2666>.
- 645 23. Frade, P.R., Bongaerts, P., Englebert, N., Rogers, A., Gonzalez-Rivero, M., and  
646 Hoegh-Guldberg, O. (2018). Deep reefs of the Great Barrier Reef offer limited thermal  
647 refuge during mass coral bleaching. *Nat. Commun.* *9*, 3447. Available at:  
648 <http://www.nature.com/articles/s41467-018-05741-0>.
- 649 24. Grottoli, A.G., Warner, M.E., Levas, S.J., Aschaffenburg, M.D., Schoepf, V.,  
650 Mcginley, M., Baumann, J., and Matsui, Y. (2014). The cumulative impact of annual  
651 coral bleaching can turn some coral species winners into losers. *Glob. Chang. Biol.* *20*,  
652 3823–3833.
- 653 25. Smith, L.W., Barshis, D., and Birkeland, C. (2007). Phenotypic plasticity for skeletal  
654 growth, density and calcification of *Porites lobata* in response to habitat type. *Coral*  
655 *Reefs* *26*, 559–567.
- 656 26. Doszpot, N., McWilliam, M., Pratchett, M., Hoey, A., and Figueira, W. (2019).  
657 Plasticity in Three-Dimensional Geometry of Branching Corals Along a Cross-Shelf  
658 Gradient. *Diversity* *11*, 44. Available at: <https://www.mdpi.com/1424-2818/11/3/44>.
- 659 27. Kahng, S.E., Akkaynak, D., Shlesinger, T., Hochberg, E.J., Wiedenmann, J., Tamir,  
660 R., and Tchernov, D. (2019). Light, Temperature, Photosynthesis, Heterotrophy, and  
661 the Lower Depth Limits of Mesophotic Coral Ecosystems. In *Mesophotic Coral*  
662 *Ecosystems*, Y. Loya, K. A. Puglise, and T. C. L. Bridge, eds. (Cham: Springer  
663 International Publishing), pp. 801–828. Available at:

- 664 319-92735-0\_42.
- 665 28. Pratchett, M.S., Anderson, K.D., Hoogenboom, M.O., Widman, E., Baird, A.H.,  
666 Pandolfi, J.M., Edmunds, P.J., and Lough, J.M. (2015). Spatial, Temporal and  
667 Taxonomic Variation in Coral Growth—Implications for the Structure and Function of  
668 Coral Reef Ecosystems. *Oceanogr. Mar. Biol. An Annu. Rev.* 53, 215–296.
- 669 29. Kramer, N., Tamir, R., Eyal, G., and Loya, Y. (2020). Coral Morphology Portrays the  
670 Spatial Distribution and Population Size-Structure Along a 5–100 m Depth Gradient.  
671 *Front. Mar. Sci.* 7, 615. Available at:  
672 <https://www.frontiersin.org/article/10.3389/fmars.2020.00615>.
- 673 30. Tamir, R., Eyal, G., Kramer, N., Laverick, J.H., and Loya, Y. (2019). Light  
674 environment drives the shallow to mesophotic coral community transition. *Ecosphere*  
675 10, e02839.
- 676 31. Semmler, R.F., Hoot, W.C., and Reaka, M.L. (2016). Are mesophotic coral  
677 ecosystems distinct communities and can they serve as refugia for shallow reefs? *Coral*  
678 *Reefs*. Available at: <http://link.springer.com/10.1007/s00338-016-1530-0>.
- 679 32. Kramer, N., Eyal, G., Tamir, R., and Loya, Y. (2019). Upper mesophotic depths in the  
680 coral reefs of Eilat, Red Sea, offer suitable refuge grounds for coral settlement. *Sci.*  
681 *Rep.* 9, 2263. Available at: <http://www.nature.com/articles/s41598-019-38795-1>.
- 682 33. Turner, J.A., Thomson, D.P., Cresswell, A.K., Trajon, M., Babcock, R.C., and Turner,  
683 J.A. (2018). Depth-related patterns in coral recruitment across a shallow to mesophotic  
684 gradient. *Coral Reefs*. Available at: <https://doi.org/10.1007/s00338-018-1696-8>.
- 685 34. Goodbody-Gringley, G., Wong, K.H., Becker, D.M., Glennon, K., and de Putron, S.J.  
686 (2018). Reproductive ecology and early life history traits of the brooding coral, *Porites*  
687 *astreoides*, from shallow to mesophotic zones. *Coral Reefs*. Available at:  
688 <https://doi.org/10.1007/s00338-018-1673-2>.

- 689 35. Shlesinger, T., and Loya, Y. (2019). Sexual Reproduction of Scleractinian Corals in  
690 Mesophotic Coral Ecosystems vs. Shallow Reefs. In *Mesophotic Coral Ecosystems*, Y.  
691 Loya, K. A. Puglise, and T. C. L. Bridge, eds. (Cham: Springer International  
692 Publishing), pp. 653–666. Available at: [https://doi.org/10.1007/978-3-319-92735-](https://doi.org/10.1007/978-3-319-92735-0_35)  
693 [0\\_35](https://doi.org/10.1007/978-3-319-92735-0_35).
- 694 36. Studivan, M.S., Milstein, G., and Voss, J.D. (2019). *Montastraea cavernosa* corallite  
695 structure demonstrates distinct morphotypes across shallow and mesophotic depth  
696 zones in the Gulf of Mexico. *PLoS One* *14*.
- 697 37. Anthony, K.R.N., Hoogenboom, M.O., and Connolly, S.R. (2005). Adaptive variation  
698 in coral geometry and the optimization of internal colony light climates. *Funct. Ecol.*  
699 *19*, 17–26. Available at:  
700 [https://besjournals.onlinelibrary.wiley.com/doi/abs/10.1111/j.0269-](https://besjournals.onlinelibrary.wiley.com/doi/abs/10.1111/j.0269-8463.2005.00925.x)  
701 [8463.2005.00925.x](https://besjournals.onlinelibrary.wiley.com/doi/abs/10.1111/j.0269-8463.2005.00925.x).
- 702 38. Winters, G., Beer, S., Ben Zvi, B., Brickner, I., and Loya, Y. (2009). Spatial and  
703 temporal photoacclimation of *Stylophora pistillata*: Zooxanthella size, pigmentation,  
704 location and clade. *Mar. Ecol. Prog. Ser.* *384*, 107–119.
- 705 39. McCloskey, L.R., and Muscatine, L. (1984). Production and respiration in the Red Sea  
706 coral *Stylophora pistillata* as a function of depth. *Proc. R. Soc. B Biol. Sci.*
- 707 40. Wangpraseurt, D., Jacques, S., Lyndby, N., Holm, J.B., Pages, C.F., and Kühl, M.  
708 (2019). Microscale light management and inherent optical properties of intact corals  
709 studied with optical coherence tomography. *J. R. Soc. Interface* *16*.
- 710 41. Wangpraseurt, D., Jacques, S.L., Petrie, T., and Kühl, M. (2016). Monte Carlo  
711 Modeling of Photon Propagation Reveals Highly Scattering Coral Tissue. *Front. Plant*  
712 *Sci.* *7*, 1–10. Available at:  
713 <http://journal.frontiersin.org/Article/10.3389/fpls.2016.01404/abstract>.

- 714 42. Swain, T.D., DuBois, E., Gomes, A., Stoyneva, V.P., Radosevich, A.J., Henss, J.,  
715 Wagner, M.E., Derbas, J., Grooms, H.W., Velazquez, E.M., *et al.* (2016). Skeletal  
716 light-scattering accelerates bleaching response in reef-building corals (BioMed  
717 Central).
- 718 43. Eyal, G., Wiedenmann, J., Grinblat, M., D'Angelo, C., Kramarsky-Winter, E.,  
719 Treibitz, T., Ben-Zvi, O., Shaked, Y., Smith, T.B., Harii, S., *et al.* (2015). Spectral  
720 diversity and regulation of coral fluorescence in a mesophotic reef habitat in the Red  
721 Sea. PLoS One.
- 722 44. Einbinder, S., Gruber, D.F., Salomon, E., Liran, O., Keren, N., and Tchernov, D.  
723 (2016). Novel Adaptive Photosynthetic Characteristics of Mesophotic Symbiotic  
724 Microalgae within the Reef-Building Coral, *Stylophora pistillata*. Front. Mar. Sci. 3,  
725 195.
- 726 45. Kahng, S.E., Watanabe, T.K., Hu, H.-M., Watanabe, T., and Shen, C.-C. (2020).  
727 Moderate zooxanthellate coral growth rates in the lower photic zone. Coral Reefs.  
728 Available at: <https://doi.org/10.1007/s00338-020-01960-4>.
- 729 46. Fricke, H., and Meischner, D. (1985). Depth limits of Bermudan scleractinian corals: a  
730 submersible survey. Mar. Biol. 88, 175–187.
- 731 47. Smith, E.G., D'Angelo, C., Sharon, Y., Tchernov, D., and Wiedenmann, J. (2017).  
732 Acclimatization of symbiotic corals to mesophotic light environments through  
733 wavelength transformation by fluorescent protein pigments. Proc. R. Soc. B Biol. Sci.
- 734 48. Turner, J.A., Andradi-Brown, D.A., Gori, A., Bongaerts, P., Burdett, H.L., Ferrier-  
735 Pagès, C., Voolstra, C.R., Weinstein, D.K., Bridge, T.C.L., Costantini, F., *et al.*  
736 (2019). Key Questions for Research and Conservation of Mesophotic Coral  
737 Ecosystems and Temperate Mesophotic Ecosystems. In Mesophotic Coral Ecosystems,  
738 Y. Loya, K. A. Puglise, and T. C. L. Bridge, eds. (Cham: Springer International

- 739 Publishing), pp. 989–1003. Available at: [https://doi.org/10.1007/978-3-319-92735-](https://doi.org/10.1007/978-3-319-92735-0_52)  
740 [0\\_52](https://doi.org/10.1007/978-3-319-92735-0_52).
- 741 49. Mass, T., Einbinder, S., Brokovich, E., Shashar, N., Vago, R., Erez, J., and Dubinsky,  
742 Z. (2007). Photoacclimation of *Stylophora pistillata* to light extremes: Metabolism and  
743 calcification. *Mar. Ecol. Prog. Ser.* 334, 93–102.
- 744 50. Wangpraseurt, D., Holm, J.B., Larkum, A.W.D., Pernice, M., Ralph, P.J., Suggett,  
745 D.J., and Kühl, M. (2017). In vivo microscale measurements of light and  
746 photosynthesis during coral bleaching: Evidence for the optical feedback loop? *Front.*  
747 *Microbiol.* 8, 1–12.
- 748 51. Veron, C., Stafford-Smith, M., Turak, E., and DeVantier, L. (2000). Corals of the  
749 world.
- 750 52. Houlbrèque, F., and Ferrier-Pagès, C. (2009). Heterotrophy in tropical scleractinian  
751 corals. *Biol. Rev.* 84, 1–17.
- 752 53. Falkowski, P.G., and Dubinsky, Z. (1981). Light-shade adaptation of *Stylophora*  
753 *pistillata*, a hermatypic coral from the Gulf of Eilat. *Nature* 289, 172–174.
- 754 54. Marcelino, L.A., Westneat, M.W., Stoyneva, V., Henss, J., Rogers, J.D., Radosevich,  
755 A., Turzhitsky, V., Siple, M., Fang, A., Swain, T.D., *et al.* (2013). Modulation of  
756 Light-Enhancement to Symbiotic Algae by Light-Scattering in Corals and  
757 Evolutionary Trends in Bleaching. *PLoS One*.
- 758 55. Malik, A., Einbinder, S., Martinez, S., Tchernov, D., Haviv, S., Almuly, R., Zaslansky,  
759 P., Polishchuk, I., Pokroy, B., Stolarski, J., *et al.* (2020). Molecular and skeletal  
760 fingerprints of scleractinian coral biomineralization: From the sea surface to  
761 mesophotic depths. *Acta Biomater.*, 1–14. Available at:  
762 <https://doi.org/10.1016/j.actbio.2020.01.010>.
- 763 56. Cunning, R., and Baker, A.C. (2013). Excess algal symbionts increase the



- 764 susceptibility of reef corals to bleaching. *Nat. Clim. Chang.* 3, 259–262. Available at:  
765 <https://doi.org/10.1038/nclimate1711>.
- 766 57. Fantazzini, P., Mengoli, S., Pasquini, L., Bortolotti, V., Brizi, L., Mariani, M., Di  
767 Giosia, M., Fermani, S., Capaccioni, B., Caroselli, E., *et al.* (2015). Gains and losses of  
768 coral skeletal porosity changes with ocean acidification acclimation. *Nat. Commun.* 6.  
769 58. Mollica, N.R., Guo, W., Cohen, A.L., Huang, K.-F., Foster, G.L., Donald, H.K., and  
770 Solow, A.R. (2018). Ocean acidification affects coral growth by reducing skeletal  
771 density. *Proc. Natl. Acad. Sci.* 115, 1754–1759. Available at:  
772 <http://www.pnas.org/lookup/doi/10.1073/pnas.1712806115>.
- 773 59. Foster, T., Falter, J.L., McCulloch, M.T., and Clode, P.L. (2016). Ocean acidification  
774 causes structural deformities in juvenile coral skeletons. *Sci. Adv.* 2, 1–8.
- 775 60. Teixidó, N., Gambi, M.C., Parravacini, V., Kroeker, K., Micheli, F., Villéger, S., and  
776 Ballesteros, E. (2018). Functional biodiversity loss along natural CO<sub>2</sub> gradients. *Nat.*  
777 *Commun.* 9, 1–9. Available at: <http://dx.doi.org/10.1038/s41467-018-07592-1>.
- 778 61. Platt, T., Gallegos, C.L., and Harrison, W.G. (1980). Photoinhibition of photosynthesis  
779 in natural assemblages of marine phytoplankton. *J. Mar. Res.* 38, 687–701. Available  
780 at: [https://www.scopus.com/inward/record.uri?eid=2-s2.0-](https://www.scopus.com/inward/record.uri?eid=2-s2.0-0019089393&partnerID=40&md5=8a1c3c6fd1208c2f3ebb6dc553f9795f)  
781 [0019089393&partnerID=40&md5=8a1c3c6fd1208c2f3ebb6dc553f9795f](https://www.scopus.com/inward/record.uri?eid=2-s2.0-0019089393&partnerID=40&md5=8a1c3c6fd1208c2f3ebb6dc553f9795f).
- 782 62. Jeffrey, S.W., and Humphrey, G.F. (1975). New spectrophotometric equations for  
783 determining chlorophylls a, b, c1 and c2 in higher plants, algae and natural  
784 phytoplankton. *Biochem. und Physiol. der Pflanz.*
- 785 63. Wangpraseurt, D., Lichtenberg, M., Jacques, S.L., Larkum, A.W.D., and Kühl, M.  
786 (2019). Optical Properties of Corals Distort Variable Chlorophyll Fluorescence  
787 Measurements. *Plant Physiol.* 179, 1608–1619.
- 788 64. Wangpraseurt, D., Wentzel, C., Jacques, S.L., Wagner, M., and Kühl, M. (2017). In

789 vivo imaging of coral tissue and skeleton with optical coherence tomography. *J. R.*  
790 *Soc. Interface* *14*.

791 65. Jacques, S.L., and Pogue, B.W. (2008). Tutorial on diffuse light transport. *J. Biomed.*  
792 *Opt.* *13*, 041302.

793 66. Farrell, T.J., Patterson, M.S., and Wilson, B. (1992). A diffusion theory model of  
794 spatially resolved, steady-state diffuse reflectance for the noninvasive determination  
795 of tissue optical properties in vivo. *Med. Phys.* *19*, 879–888.

796 67. Jacques, S.L., Wangpraseurt, D., and Kühnl, M. (2019). Optical Properties of Living  
797 Corals Determined With Diffuse Reflectance Spectroscopy. *Front. Mar. Sci.* *6*, 1–9.

798 68. Jacques, S.L. (2013). Optical properties of biological tissues: a review. *Phys. Med.*  
799 *Biol.* *58*, R37--R61. Available at: [https://doi.org/10.1088%2F0031-](https://doi.org/10.1088%2F0031-9155%2F58%2F11%2Fr37)  
800 [9155%2F58%2F11%2Fr37](https://doi.org/10.1088%2F0031-9155%2F58%2F11%2Fr37).

801 69. Team, R.C. (2020). R: A Language and Environment for Statistical Computing. R  
802 Foundation for Statistical Computing, Vienna, Austria. URL [https://www.R-](https://www.R-project.org/)  
803 [project.org/](https://www.R-project.org/).

804 70. Pinheiro, J., Bates, D., DebRoy, S., Sarkar, D., and Team, R.C. (2020). {nlme}: Linear  
805 and Nonlinear Mixed Effects Model. Available at: [http://cran.r-](http://cran.r-project.org/package=nlme)  
806 [project.org/package=nlme](http://cran.r-project.org/package=nlme).

807 71. Luo, D., Ganesh, S., and Koolaard, J. (2020). predictmeans: Calculate Predicted Means  
808 for Linear Models. Available at: <http://cran.r-project.org/package=predictmeans>.

809 72. Ho, J., Tumkaya, T., Aryal, S., Choi, H., and Claridge-Chang, A. (2019). Moving  
810 beyond P values: data analysis with estimation graphics. *Nat. Methods* *16*, 565–566.  
811 Available at: <https://doi.org/10.1038/s41592-019-0470-3>.

812

813

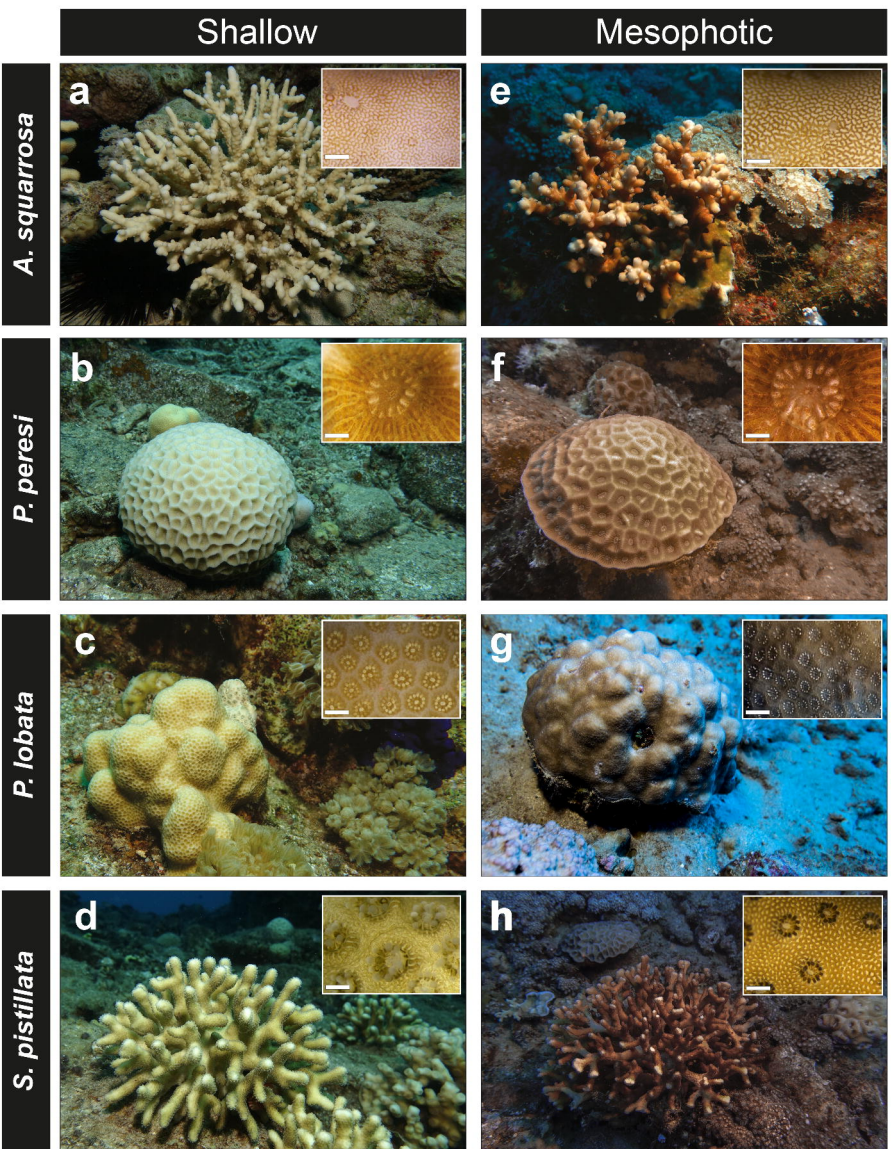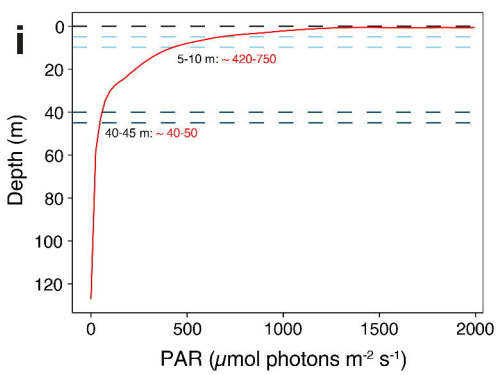

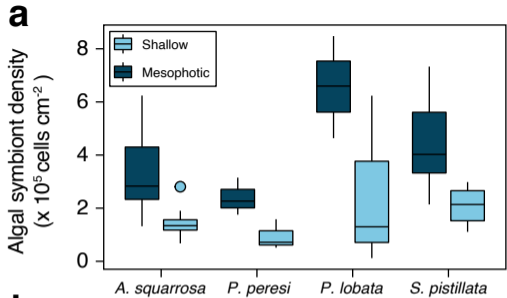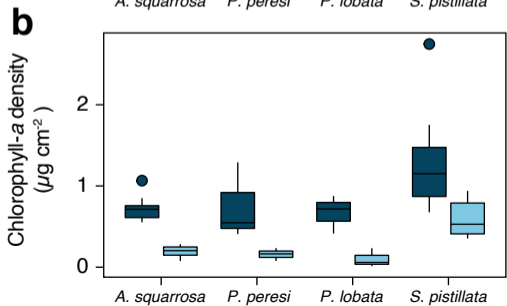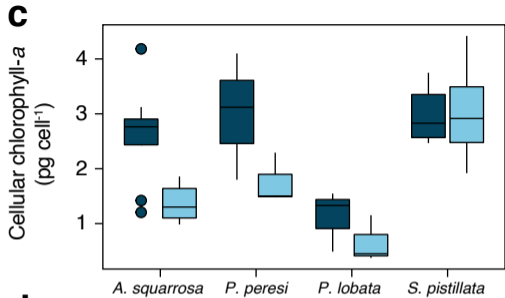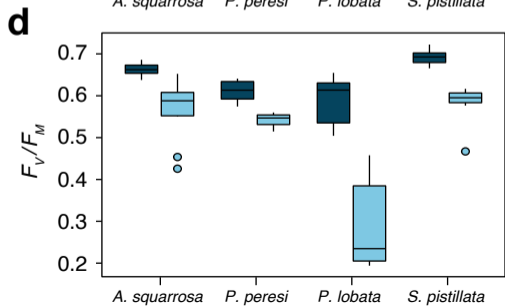

# *A. squarrosa*

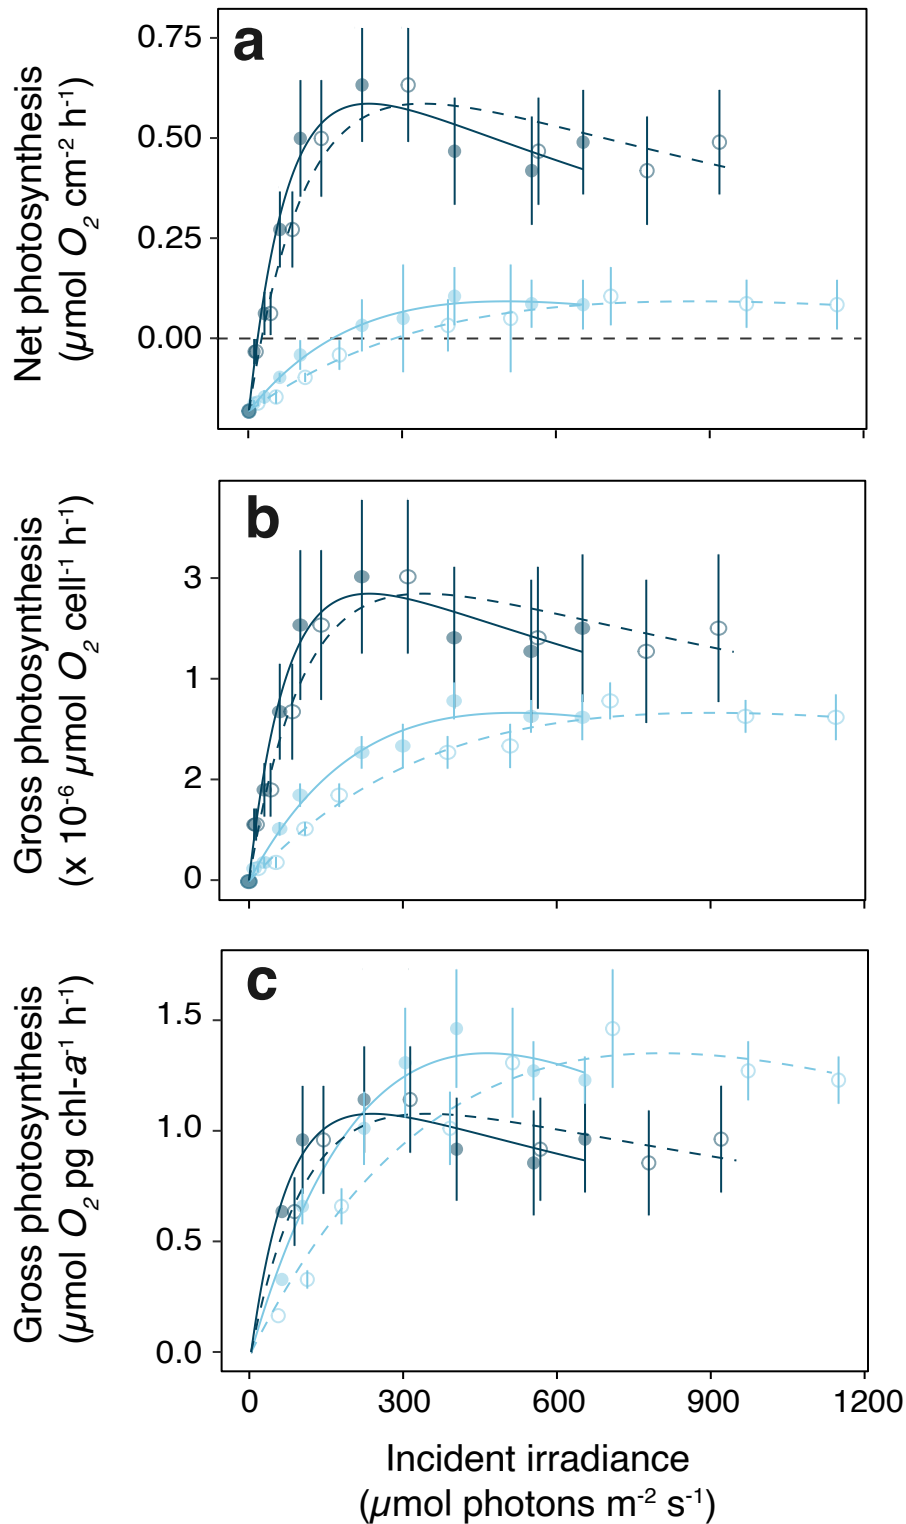

# *S. pistillata*

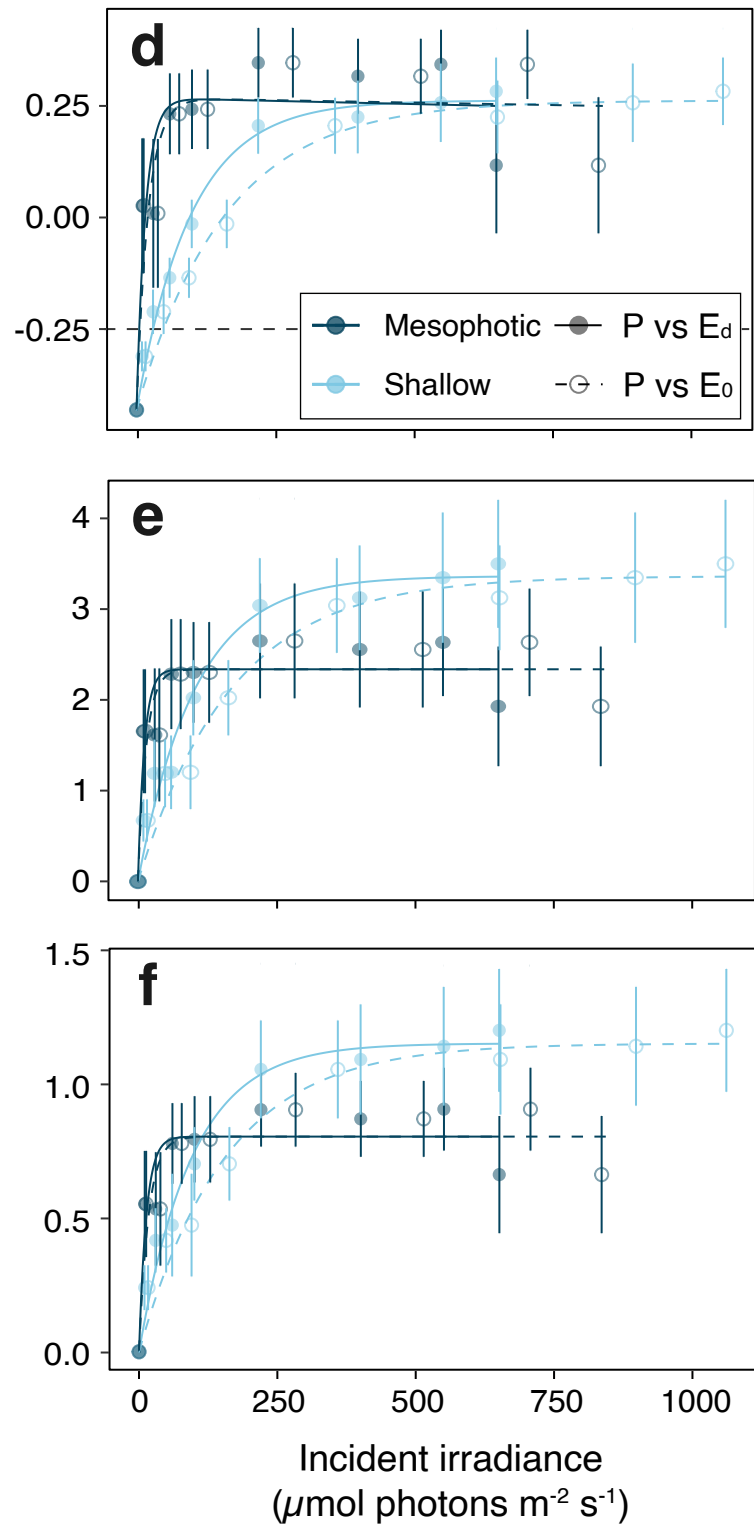

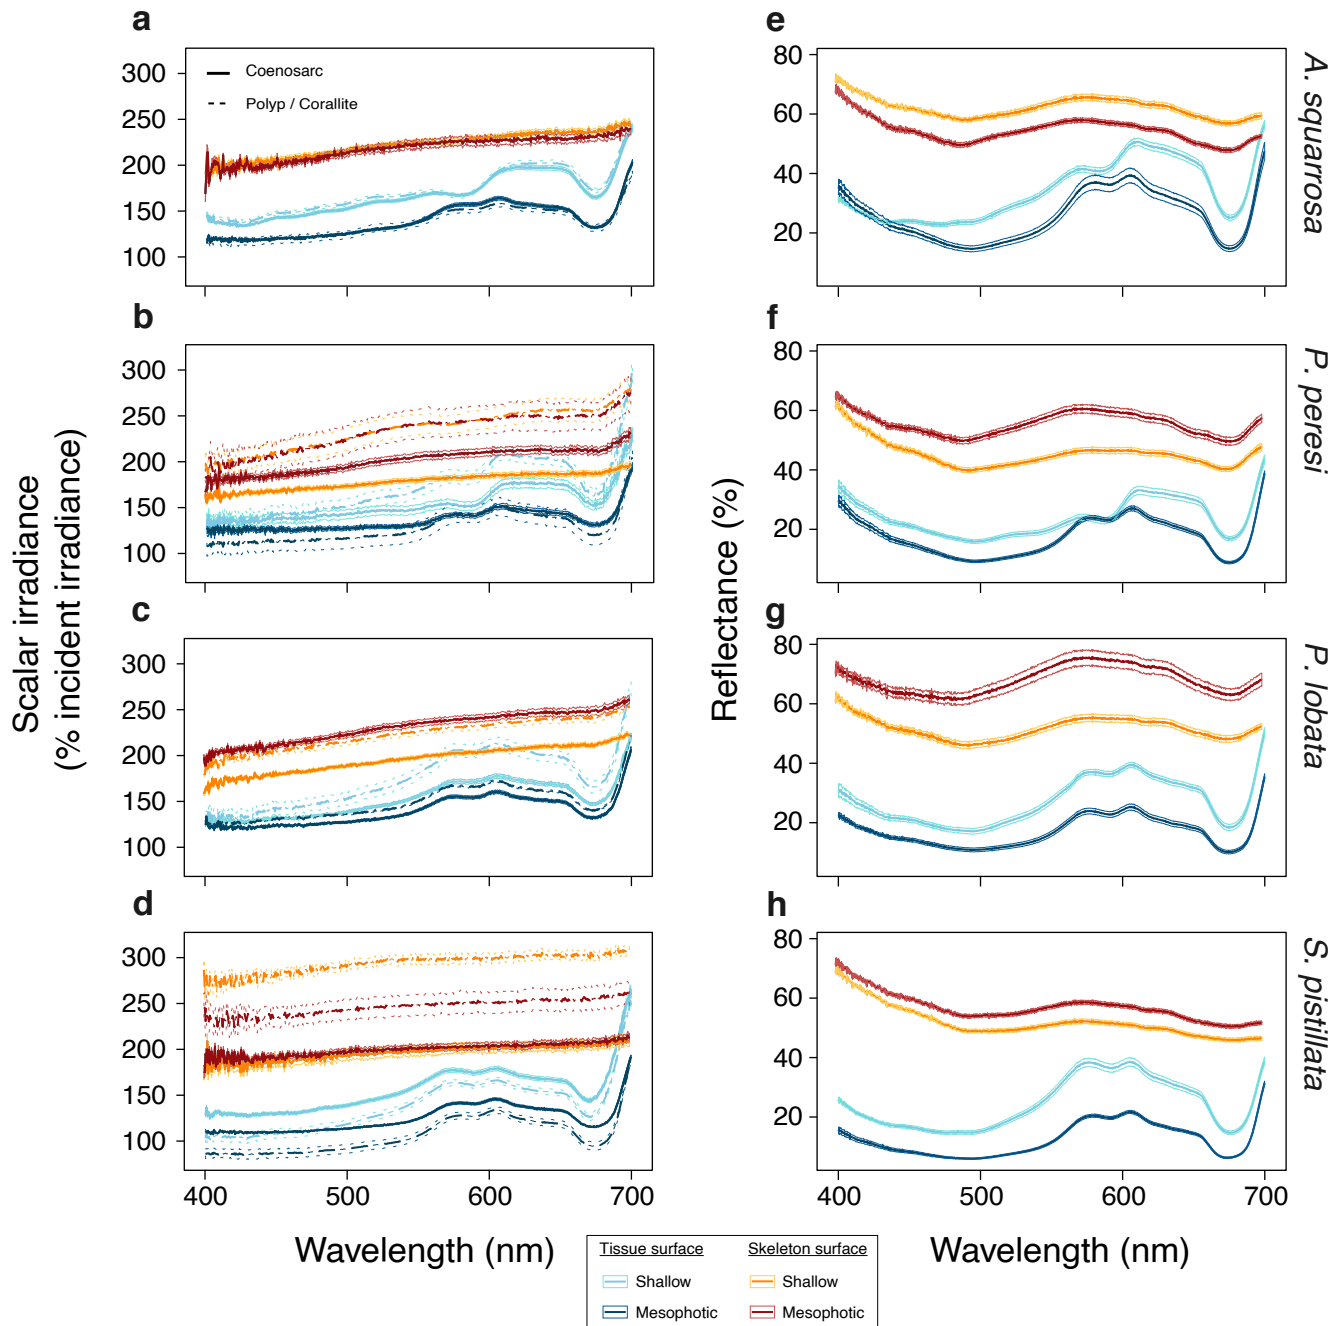



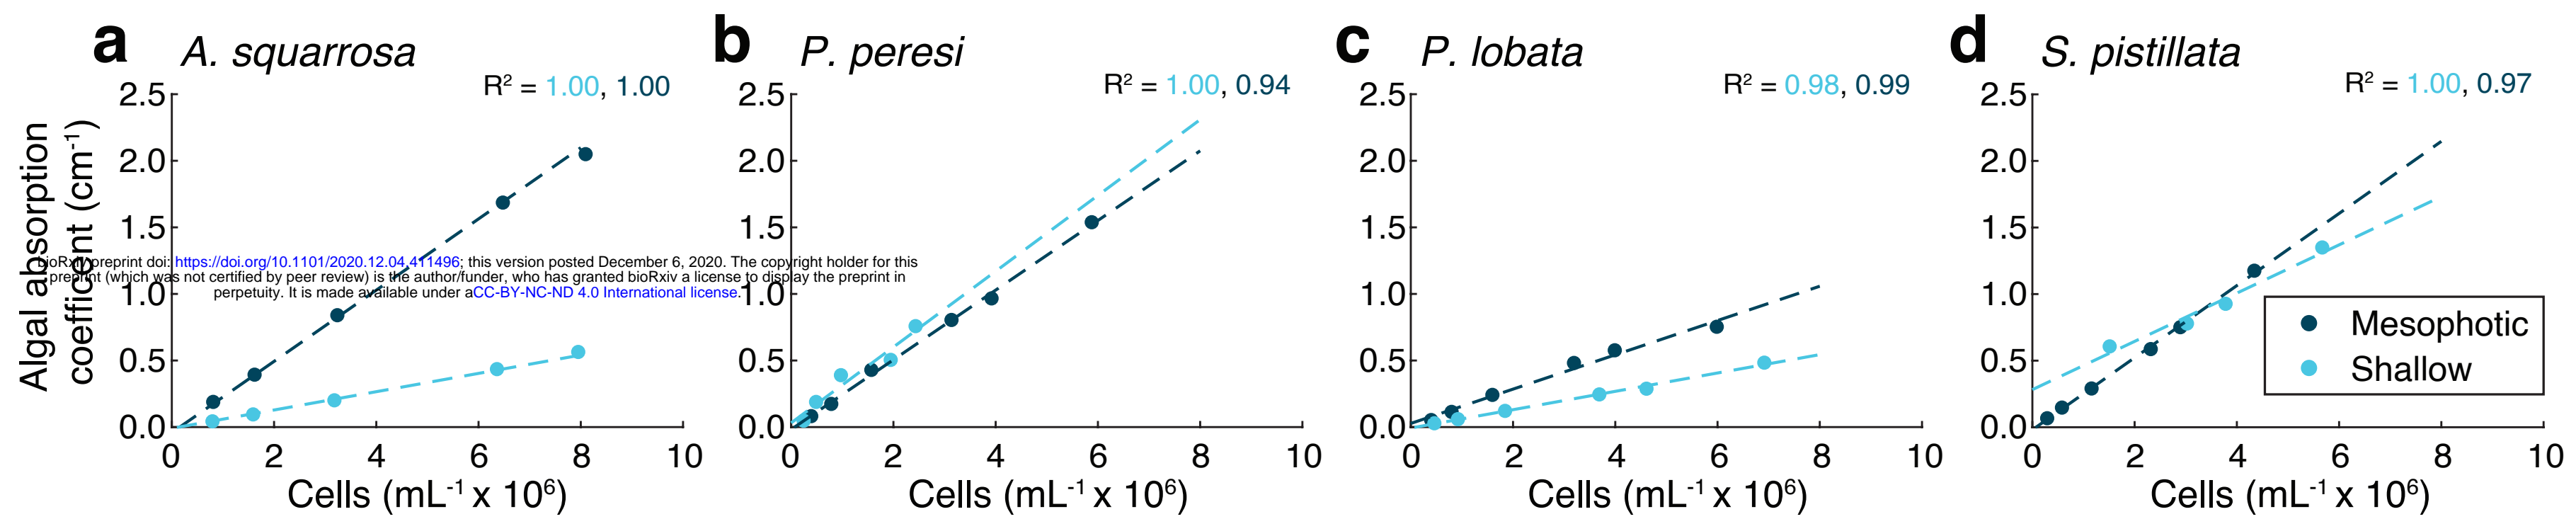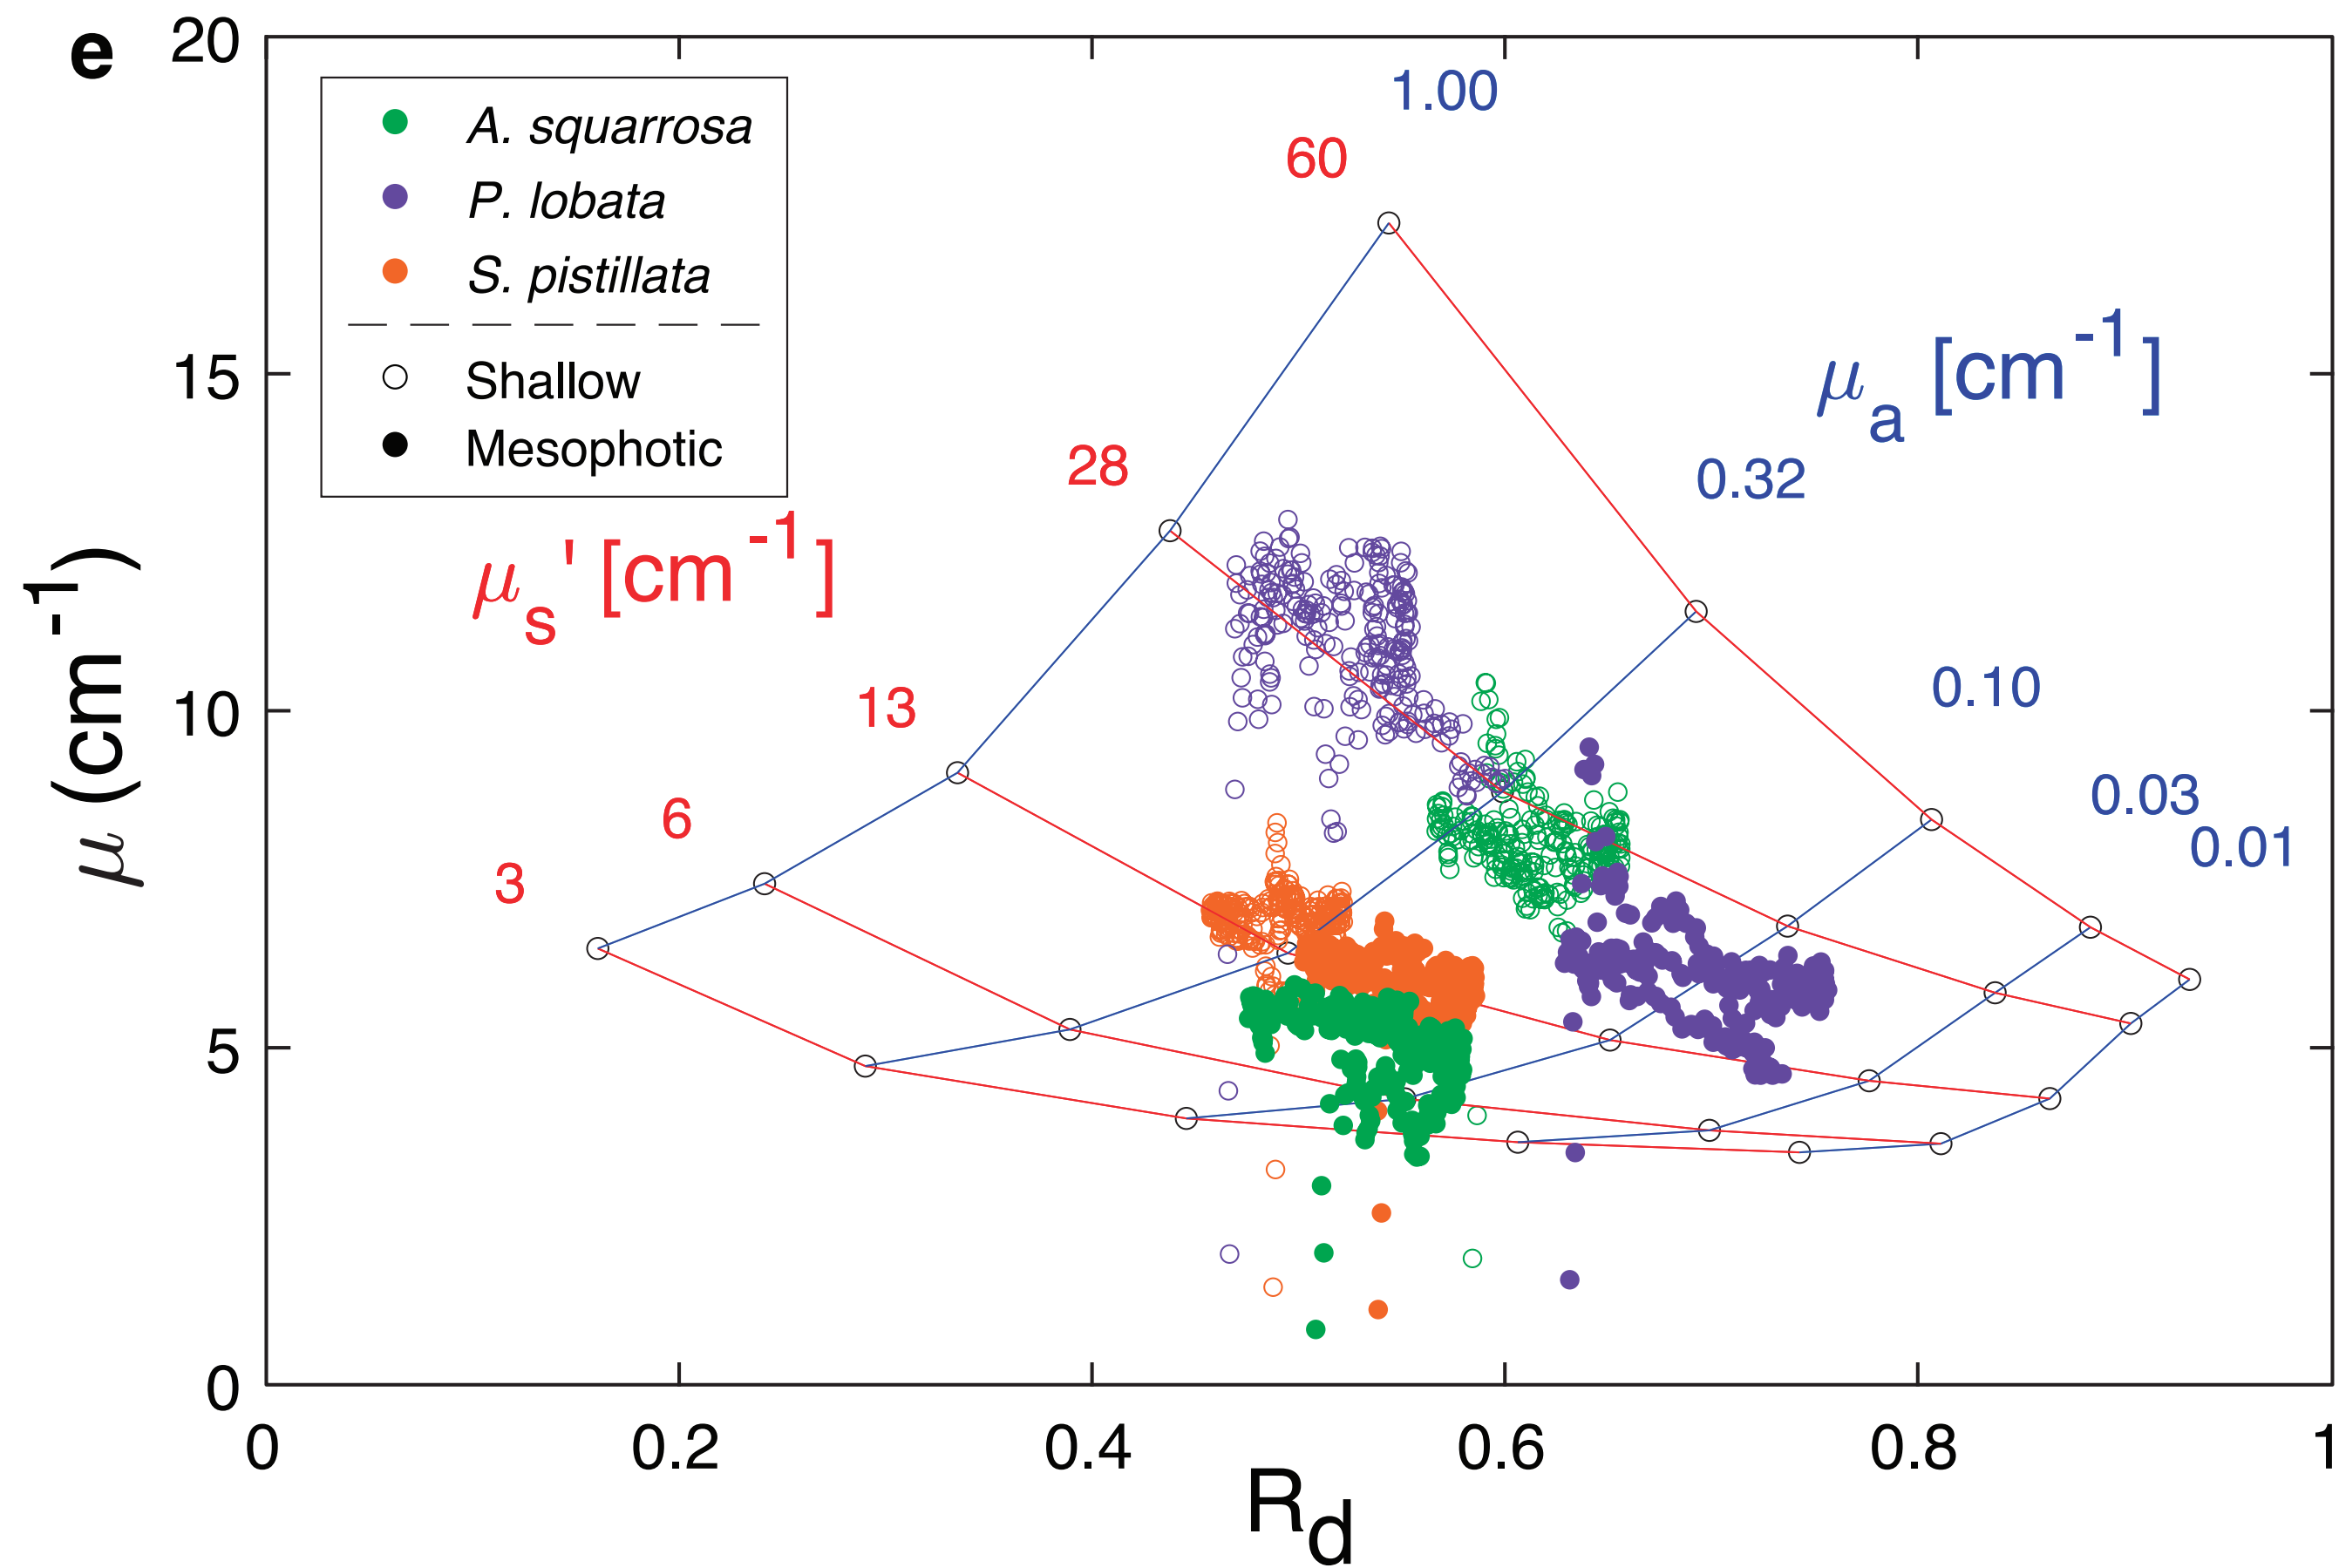

Source: http://biorxiv.org/content/10.1101/2020.12.04.411496v1.full.pdf
